# Supplementary material for: Profiling chromatin accessibility responses in human neutrophils with sensitive pathogen detection
Source: Life Sci Alliance. 2021 Jun 18;4(8):e202000976. doi: 10.26508/lsa.202000976 (PMC8321655; doi:10.26508/lsa.202000976)
Supplement: Supplementary file 2 [file LSA-2020-00976_TableS2.xlsx]

## Sheet: unique_motifs_induced
Homer-motif	Challenge
IRF3(IRF)/BMDM-Irf3-ChIP-Seq(GSE67343)/Homer	EC1h
IRF8(IRF)/BMDM-IRF8-ChIP-Seq(GSE77884)/Homer	EC1h
PU.1:IRF8(ETS:IRF)/pDC-Irf8-ChIP-Seq(GSE66899)/Homer	EC1h
Atf4(bZIP)/MEF-Atf4-ChIP-Seq(GSE35681)/Homer	R848
CEBP(bZIP)/ThioMac-CEBPb-ChIP-Seq(GSE21512)/Homer	R848
NF-E2(bZIP)/K562-NFE2-ChIP-Seq(GSE31477)/Homer	R848
KLF14(Zf)/HEK293-KLF14.GFP-ChIP-Seq(GSE58341)/Homer	SA
KLF6(Zf)/PDAC-KLF6-ChIP-Seq(GSE64557)/Homer	SA
Klf9(Zf)/GBM-Klf9-ChIP-Seq(GSE62211)/Homer	SA
NFY(CCAAT)/Promoter/Homer	SA
Ronin(THAP)/ES-Thap11-ChIP-Seq(GSE51522)/Homer	SA
Sp2(Zf)/HEK293-Sp2.eGFP-ChIP-Seq(Encode)/Homer	SA

## Sheet: unique_motifs_repressed
Homer-motif	Challenge
ELF1(ETS)/Jurkat-ELF1-ChIP-Seq(SRA014231)/Homer	EC1h
Elk1(ETS)/Hela-Elk1-ChIP-Seq(GSE31477)/Homer	EC1h
Elk4(ETS)/Hela-Elk4-ChIP-Seq(GSE31477)/Homer	EC1h
ERG(ETS)/VCaP-ERG-ChIP-Seq(GSE14097)/Homer	EC1h
Ets1-distal(ETS)/CD4+-PolII-ChIP-Seq(Barski_et_al.)/Homer	EC1h
ETS(ETS)/Promoter/Homer	EC1h
ETV4(ETS)/HepG2-ETV4-ChIP-Seq(ENCODE)/Homer	EC1h
EWS:ERG-fusion(ETS)/CADO_ES1-EWS:ERG-ChIP-Seq(SRA014231)/Homer	EC1h
EWS:FLI1-fusion(ETS)/SK_N_MC-EWS:FLI1-ChIP-Seq(SRA014231)/Homer	EC1h
KLF1(Zf)/HUDEP2-KLF1-CutnRun(GSE136251)/Homer	EC1h
KLF3(Zf)/MEF-Klf3-ChIP-Seq(GSE44748)/Homer	EC1h
Klf9(Zf)/GBM-Klf9-ChIP-Seq(GSE62211)/Homer	EC1h
NFY(CCAAT)/Promoter/Homer	EC1h
Sp1(Zf)/Promoter/Homer	EC1h
