# Supplementary material for: Profiling chromatin accessibility responses in human neutrophils with sensitive pathogen detection
Source: Life Sci Alliance. 2021 Jun 18;4(8):e202000976. doi: 10.26508/lsa.202000976 (PMC8321655; doi:10.26508/lsa.202000976)
Supplement: Supplementary file 4 [file LSA-2020-00976_TableS4.xlsx]

## Sheet: logfc-defined
GeneID	logFC.EC1h	logCPM.EC1h	PValue.EC1h		logFC.EC4h	logCPM.EC4h	PValue.EC4h	Expression_Pattern
100130097	-1.53033	-0.886912	0.0303084		-3.24267	-0.886912	0.00238888	down
100132909	-1.04733	1.03856	0.00357545		-1.93942	1.03856	0.00022788	down
100507458	-1.08222	-0.847143	0.0353853		-3.51277	-0.847143	0.00242354	down
10161	-1.45117	0.464374	0.00170699		-1.1766	0.464374	0.0202473	down
115	-1.07748	-0.514194	0.0228644		-1.31765	-0.514194	0.0451477	down
1462	-1.63161	0.620886	0.00201364		-8.65899	0.620886	3.59334e-05	down
28414	-2.29058	-0.98834	0.00084451		-6.75654	-0.98834	0.000540827	down
677777	-1.04509	-0.684921	0.0246529		-2.12418	-0.684921	0.00800226	down
85415	-2.20957	-1.55622	0.0441488		-2.12986	-1.55622	0.025762	down
92342	-1.2502	-0.531473	0.015137		-1.37028	-0.531473	0.0211885	down
100272147	-2.02928	-1.57309	0.0301079		0.819008	-1.57309	0.369844	down1h
100505991	-1.08749	-0.654841	0.0376912		-0.65208	-0.654841	0.307988	down1h
100506015	-5.35225	-2.25647	0.0132987		2.61746	-2.25647	0.0543721	down1h
100506435	-3.26489	-2.56064	0.0242636		4.21322	-2.56064	0.0784889	down1h
100506659	-4.66901	-2.60659	0.0465409		-4.89212	-2.60659	0.115289	down1h
1161	-1.69554	-0.979473	0.00679624		-0.431191	-0.979473	0.548475	down1h
134492	-1.53294	-0.950579	0.0194783		0.868539	-0.950579	0.127306	down1h
144717	-1.53054	-0.975023	0.0227955		-1.27278	-0.975023	0.112736	down1h
145788	-4.83313	-2.80095	0.0498033		-3.54457	-2.80095	0.332958	down1h
155370	-1.45249	-0.150443	0.00598587		0.94944	-0.150443	0.0574411	down1h
1840	-1.39059	-0.918442	0.0359877		-0.00451209	-0.918442	0.993078	down1h
2021	-2.34133	-1.70942	0.0226924		1.66913	-1.70942	0.121968	down1h
22982	-5.23787	-2.39386	0.0129775		-0.477838	-2.39386	0.737048	down1h
25842	-1.18931	-0.232565	0.00603061		0.0196009	-0.232565	0.963202	down1h
25950	-1.10579	0.177549	0.0147265		-0.98683	0.177549	0.0645251	down1h
28755	-1.68332	-1.15104	0.0206296		0.300611	-1.15104	0.704043	down1h
28786	-4.66989	-2.85177	0.041191		-3.54955	-2.85177	0.286764	down1h
28803	-1.9365	0.206995	0.000111659		0.562369	0.206995	0.137763	down1h
28942	-1.1016	-1.04845	0.0441382		0.699696	-1.04845	0.280246	down1h
2906	-4.83697	-2.90221	0.0367724		3.29254	-2.90221	0.249365	down1h
2952	-1.15163	0.328754	0.0098646		0.534614	0.328754	0.184576	down1h
3003	-4.83408	-2.84382	0.041062		4.22007	-2.84382	0.12707	down1h
3039	-1.62618	1.31727	0.00300779		-0.230771	1.31727	0.598319	down1h
3040	-1.51062	2.2794	0.001653		-0.538001	2.2794	0.187648	down1h
3043	-1.39528	0.842769	0.00662481		-0.954901	0.842769	0.0707149	down1h
3047	-5.34889	-1.82436	0.00565282		0.45939	-1.82436	0.570211	down1h
3048	-2.92342	-1.67048	0.0416922		1.20566	-1.67048	0.134849	down1h
389337	-5.35082	-2.70469	0.0142926		-2.1969	-2.70469	0.512589	down1h
401466	-1.00426	0.69384	0.00725092		0.934906	0.69384	0.0173483	down1h
414918	-1.38657	-0.653862	0.0241652		-0.323958	-0.653862	0.531665	down1h
4291	-2.42894	-2.40348	0.0438325		-4.24107	-2.40348	0.125768	down1h
5184	-1.12213	-0.350277	0.0154916		0.179837	-0.350277	0.682761	down1h
5196	-1.23753	0.876392	0.0239499		-0.115348	0.876392	0.747083	down1h
54859	-1.12633	-0.885787	0.042689		-1.38233	-0.885787	0.088877	down1h
55679	-2.42549	-2.08228	0.0312101		-1.24666	-2.08228	0.278979	down1h
55706	-1.32336	-0.739722	0.0279753		0.220656	-0.739722	0.742823	down1h
5593	-2.61074	-1.82228	0.0108873		0.593928	-1.82228	0.549105	down1h
56920	-4.48679	-2.7305	0.0478256		2.15802	-2.7305	0.181868	down1h
572558	-4.98524	-2.90753	0.0421221		0	-2.90753	1	down1h
6044	-4.48679	-2.73008	0.0350707		2.15278	-2.73008	0.153264	down1h
653567	-2.34056	-1.54866	0.0102349		-0.168369	-1.54866	0.867596	down1h
654320	-1.11805	0.713547	0.0048381		-0.722641	0.713547	0.0589726	down1h
664701	-5.64332	-2.17304	0.00813138		0.455933	-2.17304	0.717512	down1h
677832	-4.98246	-2.69784	0.0179842		-0.264259	-2.69784	0.88633	down1h
7068	-2.43546	-2.08689	0.0461276		-2.27702	-2.08689	0.127761	down1h
7253	-4.48889	-2.90001	0.0463707		0.265271	-2.90001	0.898368	down1h
7620	-4.98075	-2.46728	0.0141779		0.285672	-2.46728	0.819365	down1h
79366	-1.04774	-0.109005	0.0317658		0.268258	-0.109005	0.587433	down1h
79959	-1.72142	-1.6541	0.0404254		-0.284438	-1.6541	0.768629	down1h
80975	-5.11624	-2.60183	0.0164211		0.657121	-2.60183	0.68633	down1h
83988	-1.07989	-0.229372	0.00851692		0.205243	-0.229372	0.640589	down1h
84281	-1.25124	-0.22848	0.021435		-0.422695	-0.22848	0.28133	down1h
8835	-1.42809	-1.20099	0.0463264		0.294311	-1.20099	0.67526	down1h
89927	-4.67189	-2.65256	0.0285325		-4.70058	-2.65256	0.0981455	down1h
9495	-1.71906	-1.18268	0.0179692		0.730221	-1.18268	0.165518	down1h
100049076	0.178926	0.297179	0.642788		-1.50951	0.297179	0.0162678	down4h
10005	-0.0159726	2.54828	0.945147		-1.88503	2.54828	1.3319e-05	down4h
10007	-0.116952	2.20126	0.591156		-2.35487	2.20126	9.7261e-07	down4h
10008	-0.149193	6.84257	0.416033		-2.60366	6.84257	8.04903e-09	down4h
10009	-0.278559	2.17698	0.326535		-1.10833	2.17698	0.00281864	down4h
100101267	0.194265	6.56999	0.466787		-1.02135	6.56999	0.00206754	down4h
100113407	0.00316773	4.91566	0.990942		-3.17215	4.91566	4.72008e-07	down4h
100126317	0.225363	-2.18132	0.795564		-5.05445	-2.18132	0.0471941	down4h
100127983	-0.114987	-0.0340704	0.71244		-2.13945	-0.0340704	0.000979846	down4h
100128003	0.0924515	1.10564	0.721605		-2.27029	1.10564	8.41967e-05	down4h
100128071	-0.55657	1.60057	0.133921		-1.55297	1.60057	0.00455749	down4h
100128077	0.330846	1.45829	0.188433		-2.61387	1.45829	1.33101e-05	down4h
100128242	-0.131604	-0.253088	0.761278		-2.10073	-0.253088	0.013237	down4h
100128262	-0.0430022	0.716802	0.893333		-1.0417	0.716802	0.017795	down4h
100128726	0.577869	3.61023	0.13582		-2.10346	3.61023	0.000187822	down4h
100128737	-0.347602	0.926893	0.236429		-3.23442	0.926893	1.01814e-05	down4h
100128816	0.171996	2.36234	0.520374		-1.64559	2.36234	0.000111879	down4h
100128905	-0.0634354	-1.05252	0.895936		-2.44472	-1.05252	0.00995677	down4h
100128927	-0.470772	-0.566692	0.311007		-2.09296	-0.566692	0.00920594	down4h
100129034	0.123362	7.13528	0.663167		-3.58224	7.13528	6.01152e-08	down4h
100129066	-0.396312	-0.58386	0.528177		-2.11714	-0.58386	0.0210959	down4h
100129597	-0.65263	-0.32328	0.109		-4.36106	-0.32328	0.000116031	down4h
100129697	0.327069	1.29628	0.434157		-1.34524	1.29628	0.0115793	down4h
100129831	-0.0811037	3.70761	0.699106		-3.49733	3.70761	1.03132e-08	down4h
100129842	0.513674	1.67273	0.0382599		-2.38659	1.67273	1.64218e-06	down4h
100129931	-0.246012	0.196747	0.426368		-4.08079	0.196747	0.000180881	down4h
100130889	-0.157055	0.0808474	0.617399		-1.33629	0.0808474	0.0147466	down4h
100131897	1.27836	-1.87976	0.164134		-5.77813	-1.87976	0.0246784	down4h
100132077	0.0235026	-1.10893	0.967663		-1.93833	-1.10893	0.0385864	down4h
100132183	-0.0188644	-1.52968	0.974991		-2.57288	-1.52968	0.0410012	down4h
100132288	0.0277491	-1.19302	0.963492		-2.28502	-1.19302	0.0370781	down4h
100132352	-0.293533	2.17686	0.180505		-1.43217	2.17686	7.89285e-05	down4h
100133091	0.093272	0.0301024	0.784935		-1.39298	0.0301024	0.00922538	down4h
100133280	0.254041	6.11831	0.236706		-3.64829	6.11831	1.75938e-09	down4h
100134229	-0.605704	1.51704	0.0283136		-2.90985	1.51704	2.97835e-06	down4h
100144748	0.101841	1.13165	0.774234		-3.13874	1.13165	0.00164817	down4h
100170939	-0.143899	4.01196	0.553497		-2.27238	4.01196	1.45504e-06	down4h
10018	-0.0984039	5.92256	0.679367		-1.80202	5.92256	6.5223e-06	down4h
10023	-0.420136	6.74516	0.0295944		-5.03185	6.74516	1.11529e-11	down4h
100271722	-0.2363	-0.0636336	0.495416		-2.66393	-0.0636336	0.00115879	down4h
100271849	0.463403	-0.740187	0.352887		-2.40058	-0.740187	0.00754756	down4h
100272216	0.147942	1.68944	0.665324		-4.08775	1.68944	1.53783e-05	down4h
100286979	-0.134125	2.43143	0.611576		-1.58033	2.43143	0.000176162	down4h
100286988	0.0102704	3.66608	0.958114		-1.29655	3.66608	4.48821e-05	down4h
100287375	0.265115	0.27798	0.524374		-1.3586	0.27798	0.0331973	down4h
100287428	0.0766659	1.14378	0.74984		-8.42601	1.14378	1.64392e-06	down4h
100287466	0.531232	0.3064	0.0931983		-7.4571	0.3064	5.16648e-05	down4h
100287500	0.803025	-1.2634	0.139994		-6.24777	-1.2634	0.00252056	down4h
100287506	0.497716	-0.208658	0.24164		-4.39007	-0.208658	0.000300977	down4h
100287569	-0.190926	4.61758	0.453439		-1.49789	4.61758	8.29219e-05	down4h
100287759	-0.34867	1.98399	0.288995		-2.61051	1.98399	3.69993e-05	down4h
100288366	-0.256976	0.679214	0.366341		-3.12447	0.679214	0.000569106	down4h
100288807	-0.244347	-0.00798063	0.451276		-3.31939	-0.00798063	3.78072e-05	down4h
100289104	-0.192131	2.593	0.448727		-3.31131	2.593	3.10413e-06	down4h
100289269	1.1907	-1.85339	0.157776		-5.94444	-1.85339	0.0116588	down4h
100289635	-0.771787	-0.398167	0.0828151		-1.89049	-0.398167	0.008844	down4h
100290566	-0.159055	2.82369	0.455132		-1.97576	2.82369	3.52739e-06	down4h
100293516	0.175343	2.49575	0.529146		-1.87393	2.49575	0.00011421	down4h
100294005	1.261	-1.59048	0.0817615		-5.7796	-1.59048	0.0143	down4h
100302692	0.184089	0.776022	0.595025		-1.278	0.776022	0.0166323	down4h
100329109	-0.0880086	-0.0653766	0.823857		-2.07436	-0.0653766	0.00204197	down4h
100422910	0.364927	-1.30949	0.488354		-2.03963	-1.30949	0.0320549	down4h
100505586	-1.03849	-1.11916	0.0863595		-2.28193	-1.11916	0.0278337	down4h
100505594	0.226743	-1.73551	0.737597		-5.04636	-1.73551	0.0452381	down4h
100505611	-0.943041	-2.06183	0.236296		-4.88825	-2.06183	0.0449035	down4h
100505620	-0.302953	-1.19331	0.634817		-6.1742	-1.19331	0.0126778	down4h
100505641	-0.0926341	6.30878	0.649068		-1.05716	6.30878	0.000197724	down4h
100505643	0.391855	-1.50445	0.528485		-2.74408	-1.50445	0.0305171	down4h
100505696	0.090927	3.97418	0.699186		-2.30057	3.97418	1.14096e-06	down4h
100505702	-0.105067	2.9123	0.649915		-1.14266	2.9123	0.000530968	down4h
100505767	-0.16391	1.82763	0.622101		-2.7116	1.82763	4.12216e-05	down4h
100505771	-0.542294	2.59756	0.0224468		-2.86333	2.59756	1.91126e-07	down4h
100505783	-0.248364	3.35157	0.422599		-1.30656	3.35157	0.00166561	down4h
100505798	0.0317853	2.73952	0.889918		-1.20923	2.73952	0.000518059	down4h
100505812	-0.371895	5.45487	0.11637		-2.32447	5.45487	3.75605e-07	down4h
100505833	0.226288	-0.714363	0.599623		-3.65045	-0.714363	0.00152985	down4h
100505854	-0.212462	2.36563	0.354639		-2.78986	2.36563	5.75094e-07	down4h
100505859	1.32536	-2.11344	0.252527		-5.8588	-2.11344	0.0284031	down4h
100505867	0.527404	-1.05402	0.412452		-2.29597	-1.05402	0.0191833	down4h
100505933	0.663403	-0.875677	0.147935		-2.24563	-0.875677	0.00480088	down4h
100505956	-0.222476	4.57821	0.334957		-2.25032	4.57821	7.0959e-07	down4h
100506001	0.443118	1.49584	0.153374		-1.51083	1.49584	0.00159811	down4h
100506007	-0.353863	-1.35229	0.541185		-3.21404	-1.35229	0.00715341	down4h
100506008	0.0441813	2.86193	0.836022		-1.03426	2.86193	0.000490801	down4h
100506031	0.136024	0.347713	0.750977		-2.3954	0.347713	0.00231924	down4h
100506075	0.234449	1.81065	0.297867		-3.18889	1.81065	1.14242e-07	down4h
100506080	-0.579276	0.0234244	0.246461		-1.38909	0.0234244	0.0314783	down4h
100506084	0.437998	1.27998	0.290211		-1.28476	1.27998	0.0218172	down4h
100506087	-0.000151055	6.05483	0.999519		-2.60616	6.05483	3.79317e-07	down4h
100506119	0.264696	1.54036	0.287746		-1.8893	1.54036	6.85057e-05	down4h
100506155	-0.108865	1.26269	0.678607		-1.33436	1.26269	0.00149947	down4h
100506156	0.262854	0.139046	0.591918		-1.822	0.139046	0.0217129	down4h
100506159	-0.588978	1.87042	0.0129486		-3.6121	1.87042	1.64309e-07	down4h
100506162	0.318096	4.18485	0.165663		-1.33063	4.18485	7.58056e-05	down4h
100506164	-0.830332	-1.39924	0.244893		-6.49167	-1.39924	0.00487743	down4h
100506180	0.669	-0.831109	0.307491		-2.3736	-0.831109	0.0271006	down4h
100506190	-0.0860048	5.82793	0.747013		-2.488	5.82793	1.30923e-06	down4h
100506200	0.27251	5.01339	0.44101		-3.72101	5.01339	7.34718e-07	down4h
100506205	-0.0411663	1.68449	0.855549		-1.73236	1.68449	3.84175e-05	down4h
100506215	-0.205217	-0.759609	0.658357		-2.88775	-0.759609	0.00307563	down4h
100506261	-0.163171	-0.0403893	0.642643		-2.293	-0.0403893	0.00113828	down4h
100506262	0.822133	-1.88648	0.273741		-5.04865	-1.88648	0.0452844	down4h
100506276	-0.389573	-0.431559	0.362178		-6.66409	-0.431559	0.00167128	down4h
100506302	-0.334665	-0.586591	0.50588		-2.60393	-0.586591	0.00551199	down4h
100506311	-0.372105	5.42441	0.174674		-1.96039	5.42441	1.01782e-05	down4h
100506328	-0.0830289	3.02006	0.697875		-2.28914	3.02006	1.24957e-06	down4h
100506343	0.194844	-0.0372555	0.568499		-4.43659	-0.0372555	7.32256e-05	down4h
100506407	0.856689	-0.712381	0.10972		-7.01888	-0.712381	0.00119225	down4h
100506482	-0.231383	3.82288	0.313913		-1.16894	3.82288	0.000293164	down4h
100506523	0.330219	0.90772	0.295409		-1.17725	0.90772	0.00779827	down4h
100506546	-0.685417	0.410587	0.0430072		-1.33508	0.410587	0.00402934	down4h
100506548	-0.0158281	0.5968	0.961258		-1.20034	0.5968	0.0108358	down4h
100506556	0.76856	-2.39267	0.482323		-5.33608	-2.39267	0.035612	down4h
100506585	0.204911	2.58957	0.327385		-2.36946	2.58957	5.83443e-07	down4h
100506607	-0.504985	-0.541608	0.258918		-2.22461	-0.541608	0.0294281	down4h
100506608	0.637373	0.739401	0.0417262		-1.94123	0.739401	0.000160314	down4h
100506636	0.382538	0.773702	0.1939		-5.63008	0.773702	9.82904e-07	down4h
100506637	-0.188204	-1.51484	0.764913		-6.02344	-1.51484	0.00755016	down4h
100506639	0.244247	1.13393	0.435945		-2.27341	1.13393	0.00017216	down4h
100506649	-0.575477	0.377707	0.0659593		-1.879	0.377707	0.00146227	down4h
100506669	-0.39831	1.07377	0.184038		-2.37712	1.07377	0.000120223	down4h
100506683	0.387521	2.07826	0.179726		-1.93745	2.07826	0.000106655	down4h
100506709	-0.166081	0.592302	0.71455		-2.50456	0.592302	0.00150977	down4h
100506710	-0.169941	5.13001	0.516414		-1.59772	5.13001	5.98755e-05	down4h
100506761	-0.292386	1.9203	0.261807		-1.93954	1.9203	4.47481e-05	down4h
100506774	0.0993918	3.18393	0.757422		-1.14189	3.18393	0.00604107	down4h
100506784	-0.477631	-0.705049	0.44563		-1.56045	-0.705049	0.0266748	down4h
100506819	0.216035	-2.21562	0.807619		-5.19732	-2.21562	0.0365606	down4h
100506842	-0.0101798	-0.00279827	0.981678		-1.34841	-0.00279827	0.00861523	down4h
100506875	0.0733863	-0.0648929	0.854712		-1.23068	-0.0648929	0.0302544	down4h
100506900	-0.0548474	1.62683	0.876075		-1.13145	1.62683	0.0152759	down4h
100506904	-0.281798	5.74661	0.23301		-1.31554	5.74661	9.28081e-05	down4h
100506908	-0.183649	-0.14491	0.727839		-2.21813	-0.14491	0.016736	down4h
100506914	0.0935165	4.95208	0.660328		-2.88584	4.95208	2.40601e-08	down4h
100506922	-0.00154734	0.494322	0.995616		-1.5941	0.494322	0.00167519	down4h
100506961	-0.118151	4.89383	0.663256		-3.32905	4.89383	1.03302e-07	down4h
100506992	-0.500122	-1.00988	0.328524		-1.53246	-1.00988	0.0260592	down4h
100507018	0.360843	-1.33317	0.505253		-2.81982	-1.33317	0.0188035	down4h
100507022	0.760079	1.72339	0.0823599		-2.02112	1.72339	0.00292207	down4h
100507025	-0.136064	1.1486	0.666473		-1.14215	1.1486	0.0110651	down4h
100507032	-0.249696	0.194335	0.496137		-1.77477	0.194335	0.000793699	down4h
100507054	-0.0955003	-0.0486081	0.77758		-1.3327	-0.0486081	0.0184804	down4h
100507062	0.196541	4.15775	0.373444		-3.71626	4.15775	9.01272e-09	down4h
100507081	0.392323	4.15372	0.391073		-2.07814	4.15372	0.00100644	down4h
100507087	0.620069	-0.139293	0.132603		-1.71994	-0.139293	0.013594	down4h
100507090	0.390236	2.80652	0.144847		-1.09487	2.80652	0.00174833	down4h
100507092	0.346138	1.85273	0.156196		-1.2549	1.85273	0.000725815	down4h
100507095	0.897985	-0.724912	0.0603267		-3.20527	-0.724912	0.00749215	down4h
100507099	-0.256954	0.608673	0.459503		-2.97845	0.608673	9.26606e-05	down4h
100507238	-0.488615	0.592083	0.152159		-1.59738	0.592083	0.00239831	down4h
100507248	-0.0915998	-2.21362	0.934489		-5.94102	-2.21362	0.0147469	down4h
100507278	-0.197491	-0.589467	0.684315		-1.46173	-0.589467	0.0462186	down4h
100507290	0.128845	5.00804	0.536699		-1.91788	5.00804	1.11874e-06	down4h
100507302	-0.473078	1.21006	0.114292		-1.05852	1.21006	0.0104756	down4h
100507304	0.174988	0.378158	0.64148		-2.01659	0.378158	0.00150009	down4h
100507322	-0.0532669	1.1452	0.86109		-2.18723	1.1452	0.00013985	down4h
100507331	-0.118795	1.93706	0.632673		-1.72704	1.93706	0.000168201	down4h
100507355	0.190279	-0.526347	0.690503		-2.92766	-0.526347	0.00603852	down4h
100507392	-0.0270284	1.27177	0.929057		-1.36454	1.27177	0.00438897	down4h
100507398	-0.169895	0.268897	0.582046		-1.9195	0.268897	0.00060929	down4h
100507399	1.19612	-2.05059	0.179662		-5.20633	-2.05059	0.0430122	down4h
100507419	-0.128185	4.53454	0.502671		-1.6545	4.53454	2.27988e-06	down4h
100507436	-0.226631	2.18066	0.301355		-1.54018	2.18066	2.31383e-05	down4h
100507508	-0.213206	0.118818	0.546013		-1.11726	0.118818	0.036381	down4h
100507522	-0.287109	0.589778	0.328512		-1.89282	0.589778	0.000296094	down4h
100507619	-0.325124	-0.350582	0.40202		-1.35728	-0.350582	0.0365352	down4h
100507655	-0.609686	-0.666636	0.206543		-2.23004	-0.666636	0.0325465	down4h
10053	-0.345343	1.1198	0.211014		-2.3187	1.1198	3.24983e-05	down4h
10057	0.246699	5.41192	0.33549		-1.36925	5.41192	0.000164476	down4h
10058	0.501558	2.47238	0.035009		-1.55104	2.47238	2.02826e-05	down4h
10062	-0.167872	-0.493377	0.696391		-1.56598	-0.493377	0.0213674	down4h
10077	0.0348988	3.3448	0.880405		-1.0548	3.3448	0.00123453	down4h
10102	-0.665084	0.225508	0.0668455		-1.06045	0.225508	0.0225022	down4h
10106	0.0253034	9.37387	0.908331		-1.29325	9.37387	6.50805e-05	down4h
10113	-0.0954879	3.08568	0.685919		-1.31144	3.08568	0.000245437	down4h
10116	-0.0006869	2.67223	0.998263		-3.13951	2.67223	4.42137e-06	down4h
10129	0.361057	7.48669	0.427069		-1.38629	7.48669	0.0091623	down4h
10140	-0.224523	4.39966	0.272811		-1.36895	4.39966	2.72313e-05	down4h
10144	-0.138341	1.25079	0.566593		-2.33705	1.25079	0.000122142	down4h
10147	0.107334	4.2044	0.64836		-1.17451	4.2044	0.000388086	down4h
10152	-0.285309	0.0600456	0.407465		-1.43548	0.0600456	0.00739516	down4h
10168	-0.266535	0.150633	0.619059		-1.61736	0.150633	0.0401366	down4h
10170	-0.187191	4.21986	0.400785		-3.78086	4.21986	5.17451e-09	down4h
10184	-0.138458	1.93247	0.600596		-2.20296	1.93247	3.62664e-05	down4h
10188	0.113173	6.88371	0.531084		-1.12738	6.88371	3.48686e-05	down4h
10190	-0.324997	2.22168	0.15447		-1.74985	2.22168	2.49374e-05	down4h
10194	0.140135	1.3297	0.716354		-2.00474	1.3297	0.00205688	down4h
10201	0.0425127	1.70943	0.860716		-3.57517	1.70943	3.64468e-07	down4h
10224	0.00229794	-0.533371	0.995891		-3.64947	-0.533371	0.00284284	down4h
10228	0.00541685	5.43569	0.978932		-1.46214	5.43569	1.13073e-05	down4h
10238	-0.0642592	5.46027	0.735951		-1.12315	5.46027	6.65266e-05	down4h
10244	-0.233203	2.25478	0.352591		-1.41291	2.25478	0.000508602	down4h
10248	-0.0869229	0.672739	0.777666		-1.26732	0.672739	0.00951922	down4h
10251	0.060829	3.39946	0.856736		-1.91468	3.39946	0.000340544	down4h
1027	-0.375508	6.6506	0.0726732		-3.21463	6.6506	2.41877e-09	down4h
10270	0.112486	4.39869	0.558784		-1.3233	4.39869	2.28912e-05	down4h
10277	0.204248	6.23225	0.385874		-1.82624	6.23225	4.76424e-06	down4h
1028	-0.618784	2.80767	0.0811436		-1.59401	2.80767	0.00104926	down4h
10300	0.125871	4.25444	0.531939		-1.06221	4.25444	0.000224238	down4h
10311	-0.155264	4.87362	0.415315		-1.5154	4.87362	3.82998e-06	down4h
10316	-0.937988	-0.291868	0.0522547		-1.7484	-0.291868	0.0252868	down4h
1032	-0.112198	7.19607	0.63003		-1.16287	7.19607	0.000281899	down4h
10328	-0.137762	2.2705	0.513522		-1.27467	2.2705	0.000123997	down4h
10333	0.166736	7.42208	0.46997		-3.50952	7.42208	5.88401e-09	down4h
10335	0.0111248	7.42174	0.948913		-2.32951	7.42174	1.65839e-08	down4h
10370	-0.182887	3.94659	0.372377		-1.3891	3.94659	2.34522e-05	down4h
10376	-0.306231	6.87467	0.179918		-2.40549	6.87467	1.8534e-07	down4h
10384	0.221124	4.82998	0.323655		-1.15598	4.82998	0.000191344	down4h
10392	0.0627145	1.97454	0.797828		-2.35327	1.97454	4.50574e-06	down4h
10396	0.282066	4.3615	0.394961		-1.14396	4.3615	0.00509626	down4h
10402	-0.0448764	4.15578	0.82599		-1.83776	4.15578	1.20104e-06	down4h
10403	-0.597617	0.641484	0.0398548		-1.37707	0.641484	0.00333966	down4h
10419	-0.135079	3.61128	0.485967		-1.48311	3.61128	8.85521e-06	down4h
10422	-0.0454719	3.93674	0.847043		-1.45762	3.93674	7.8415e-05	down4h
10423	-0.241687	5.78283	0.243891		-1.31094	5.78283	2.85979e-05	down4h
10426	0.00797609	4.408	0.976056		-3.14784	4.408	2.10741e-07	down4h
10444	0.0578944	6.51846	0.744332		-1.0057	6.51846	8.90109e-05	down4h
10460	0.014341	7.73907	0.941324		-2.19637	7.73907	1.04101e-07	down4h
10472	-0.0578003	7.09974	0.74827		-2.36934	7.09974	2.00711e-08	down4h
10479	0.107985	1.99439	0.654257		-1.70796	1.99439	0.000114283	down4h
10484	-0.00879549	4.02307	0.977971		-1.07681	4.02307	0.00674711	down4h
1050	-0.0726701	4.13445	0.714482		-2.1076	4.13445	2.66088e-07	down4h
10507	0.090354	9.21939	0.594369		-1.35357	9.21939	3.04792e-06	down4h
10509	0.181624	6.75662	0.367532		-2.82353	6.75662	1.01689e-08	down4h
10512	0.170767	2.43967	0.622057		-2.1091	2.43967	0.000625783	down4h
10520	-0.312689	2.78541	0.139311		-1.04317	2.78541	0.000520211	down4h
10526	-0.0059424	4.21301	0.981201		-1.20412	4.21301	0.000601147	down4h
10557	-0.156079	0.461534	0.677705		-1.26248	0.461534	0.0205579	down4h
10605	-0.344061	1.67809	0.191464		-1.09251	1.67809	0.00372768	down4h
10606	-0.212662	0.847156	0.412684		-1.24804	0.847156	0.00430678	down4h
10608	-0.151757	3.98677	0.48692		-1.20989	3.98677	0.000192633	down4h
10612	0.0677592	1.40137	0.803624		-1.12095	1.40137	0.00653475	down4h
10613	-0.0506617	4.27035	0.806059		-1.68123	4.27035	3.37066e-05	down4h
10618	-0.0037674	8.51788	0.985575		-1.04377	8.51788	0.000264476	down4h
10620	0.100487	6.00045	0.646129		-2.28699	6.00045	2.71594e-07	down4h
10636	0.0464489	7.42476	0.809454		-3.35955	7.42476	1.23879e-09	down4h
10641	0.0847897	3.58346	0.708461		-2.06191	3.58346	2.09164e-06	down4h
10659	0.0232248	8.81318	0.902574		-2.56678	8.81318	1.50817e-08	down4h
10664	0.00753584	5.16997	0.971437		-1.37872	5.16997	2.82425e-05	down4h
10670	-0.291476	4.20426	0.144749		-1.23436	4.20426	4.20122e-05	down4h
10672	-0.171918	8.0488	0.591086		-1.37452	8.0488	0.000947521	down4h
10677	0.222082	4.92029	0.263753		-1.20666	4.92029	4.45157e-05	down4h
10678	0.0376829	3.9043	0.874737		-1.34193	3.9043	0.000162615	down4h
10712	-0.547266	1.87614	0.0426499		-1.07174	1.87614	0.00511648	down4h
10713	-0.0367261	4.03174	0.849652		-1.30995	4.03174	2.37663e-05	down4h
10724	0.126499	8.62142	0.511019		-1.16677	8.62142	4.42252e-05	down4h
10744	0.503353	-0.0679735	0.134871		-2.11558	-0.0679735	0.00128637	down4h
10745	0.211995	4.11441	0.304144		-1.14511	4.11441	0.000146397	down4h
10746	0.204879	7.72336	0.547825		-1.6335	7.72336	0.000413038	down4h
10762	0.02337	7.96722	0.895165		-1.24082	7.96722	1.22556e-05	down4h
10773	-0.0818616	2.86142	0.701053		-1.30482	2.86142	8.55248e-05	down4h
10780	-0.140048	0.0540708	0.747769		-1.23628	0.0540708	0.0282704	down4h
10783	0.303682	5.77278	0.373002		-3.65804	5.77278	4.37118e-07	down4h
10793	0.0763513	0.110009	0.846073		-2.0218	0.110009	0.00388516	down4h
10794	0.776976	1.63684	0.0784458		-1.37041	1.63684	0.0219715	down4h
10800	-0.209293	4.24205	0.457341		-1.01532	4.24205	0.00376728	down4h
10801	0.121726	6.77151	0.499611		-1.18228	6.77151	2.18845e-05	down4h
10804	-0.294598	1.12628	0.291026		-1.35854	1.12628	0.0146014	down4h
10817	-0.298125	-1.31592	0.711176		-7.01489	-1.31592	0.00339561	down4h
10845	-0.133191	3.95561	0.487199		-1.0085	3.95561	0.000197608	down4h
10869	0.0711227	6.29819	0.770986		-1.06044	6.29819	0.000881135	down4h
10875	-0.137033	9.01493	0.440518		-1.68788	9.01493	4.86978e-07	down4h
10888	0.127352	-1.78389	0.843282		-5.20292	-1.78389	0.0258947	down4h
1089	0.0350249	6.72654	0.875106		-1.97033	6.72654	1.44473e-06	down4h
10894	0.236924	2.17274	0.407283		-2.63614	2.17274	4.52892e-05	down4h
10898	-0.00492805	0.987114	0.988127		-1.8251	0.987114	0.0032972	down4h
10902	0.0184455	5.27303	0.92363		-1.54376	5.27303	3.78646e-06	down4h
10903	-0.633912	-1.94005	0.493733		-5.77119	-1.94005	0.0262188	down4h
10904	-0.331668	3.80228	0.10108		-1.33765	3.80228	1.87385e-05	down4h
10912	-0.669993	2.14718	0.0290021		-2.15345	2.14718	1.40112e-05	down4h
10919	0.0656621	1.24285	0.786843		-1.89908	1.24285	8.47018e-05	down4h
10928	-0.185479	7.64142	0.368809		-1.0206	7.64142	0.000255489	down4h
10943	-0.111205	5.73527	0.546593		-1.59288	5.73527	1.69974e-06	down4h
10978	-0.172995	3.46242	0.397158		-1.22485	3.46242	8.52517e-05	down4h
10982	-0.28746	4.15471	0.166248		-1.43343	4.15471	1.8059e-05	down4h
11000	-0.0145333	3.32397	0.939579		-2.57505	3.32397	6.47019e-08	down4h
11010	-0.175212	7.48132	0.31503		-1.05591	7.48132	3.99188e-05	down4h
11016	0.213906	4.5499	0.558232		-1.73337	4.5499	0.000611974	down4h
11019	-0.166221	0.0243219	0.595745		-1.57602	0.0243219	0.00389113	down4h
1102	-0.0443465	5.88807	0.840459		-2.63699	5.88807	7.86969e-08	down4h
11020	0.01263	0.276749	0.973666		-1.00468	0.276749	0.0285669	down4h
11024	0.0785496	7.0597	0.738043		-1.99117	7.0597	2.15387e-06	down4h
11035	0.104112	4.60981	0.620435		-2.07338	4.60981	6.77302e-07	down4h
11042	-0.0536524	2.40252	0.840422		-2.01083	2.40252	6.81151e-05	down4h
11051	-0.20035	3.26954	0.405304		-1.55584	3.26954	7.28952e-05	down4h
11057	0.161396	9.88941	0.557341		-1.71176	9.88941	3.98243e-05	down4h
11064	0.250775	4.16161	0.26691		-1.51114	4.16161	2.39168e-05	down4h
11073	0.0731986	4.78726	0.78595		-1.61736	4.78726	7.8112e-05	down4h
11083	0.107157	5.71663	0.732499		-1.25846	5.71663	0.00166408	down4h
11092	-0.284952	-1.04996	0.544208		-2.57511	-1.04996	0.0306975	down4h
11100	-0.0222534	7.61819	0.904167		-1.03776	7.61819	9.78863e-05	down4h
11101	0.0335455	1.48735	0.909293		-1.71255	1.48735	0.000685315	down4h
11107	-0.164486	2.10753	0.502615		-3.52143	2.10753	1.16068e-06	down4h
11108	-0.000325498	4.00596	0.998656		-2.02164	4.00596	5.44247e-07	down4h
11116	0.119625	3.56207	0.574013		-1.69892	3.56207	1.02616e-05	down4h
11119	0.166079	6.83816	0.446461		-1.25749	6.83816	7.18346e-05	down4h
11128	0.281253	1.30602	0.36364		-1.14154	1.30602	0.0109783	down4h
11137	-0.136378	2.7141	0.527449		-1.53392	2.7141	3.46007e-05	down4h
11158	-0.335883	1.73436	0.222739		-1.00543	1.73436	0.0120925	down4h
11160	-0.0928908	2.8695	0.677008		-2.25316	2.8695	2.17192e-06	down4h
11168	-0.182403	4.77252	0.56204		-2.21194	4.77252	2.01861e-05	down4h
11186	-0.0296387	4.41381	0.876283		-2.33263	4.41381	7.66922e-08	down4h
11188	0.0957334	4.89472	0.644623		-1.16623	4.89472	0.000121049	down4h
11190	0.0605889	2.24024	0.877298		-1.31781	2.24024	0.0152163	down4h
11201	-0.233025	1.5975	0.339262		-2.05763	1.5975	3.36493e-05	down4h
11214	0.283721	8.88238	0.275539		-2.18284	8.88238	1.96824e-06	down4h
11215	0.187617	2.51046	0.653073		-1.92825	2.51046	0.00204776	down4h
11216	0.0965133	5.40055	0.707319		-1.39377	5.40055	0.000145645	down4h
11218	-0.107056	2.74159	0.636449		-1.64685	2.74159	2.16703e-05	down4h
112399	1.54353	-1.50587	0.0571135		-6.23877	-1.50587	0.00970589	down4h
11253	0.0261127	3.09836	0.90824		-1.19593	3.09836	0.000451724	down4h
112574	-0.171419	7.07254	0.530266		-2.40204	7.07254	1.63388e-06	down4h
112616	-0.238431	3.30428	0.320132		-1.26547	3.30428	0.000341258	down4h
11264	-0.731589	-0.589227	0.139015		-1.55974	-0.589227	0.0261836	down4h
11266	-0.327147	0.5505	0.338296		-1.18633	0.5505	0.0257584	down4h
11275	0.0520654	6.25324	0.799502		-1.4128	6.25324	1.58362e-05	down4h
112770	0.00498476	2.55428	0.980336		-2.12974	2.55428	2.01825e-06	down4h
112936	-0.103934	4.81434	0.577972		-3.28915	4.81434	2.02867e-09	down4h
113	0.221332	6.97252	0.481223		-2.37665	6.97252	7.48482e-06	down4h
113000	-0.272184	2.3006	0.232877		-1.46545	2.3006	9.32666e-05	down4h
11314	0.0261644	8.0806	0.894114		-1.87318	8.0806	5.73118e-07	down4h
113179	-0.296546	-0.517568	0.47529		-1.40154	-0.517568	0.0483582	down4h
11322	0.0229492	5.98458	0.908594		-2.44753	5.98458	5.05101e-08	down4h
113230	-0.0857003	-0.297678	0.842281		-1.63329	-0.297678	0.0064611	down4h
113235	-1.21078	-1.57608	0.0867144		-2.81813	-1.57608	0.0234219	down4h
11325	0.0349608	4.98598	0.890732		-1.61618	4.98598	4.30946e-05	down4h
113251	-0.400511	0.492036	0.161507		-1.19782	0.492036	0.00635874	down4h
11328	-0.321952	1.51386	0.179685		-2.25566	1.51386	3.68785e-05	down4h
113419	-0.148316	4.09627	0.457733		-1.15654	4.09627	0.000100505	down4h
11344	-0.0849893	6.71623	0.683865		-1.78856	6.71623	1.83087e-06	down4h
113444	-0.138196	3.3579	0.534556		-1.03014	3.3579	0.000858292	down4h
113540	0.282863	4.27149	0.427979		-4.38056	4.27149	3.00612e-07	down4h
113622	0.0240979	-0.410968	0.946127		-1.53413	-0.410968	0.0305861	down4h
113763	-0.219273	2.12871	0.362075		-1.4517	2.12871	0.000437606	down4h
113802	-0.451966	2.15785	0.0502236		-2.95704	2.15785	2.03322e-07	down4h
114088	0.640517	1.49248	0.0224127		-1.49194	1.49248	0.000732755	down4h
114659	0.00185165	3.15283	0.992898		-2.39502	3.15283	2.17732e-07	down4h
114794	0.33432	-1.61001	0.617276		-3.02397	-1.61001	0.0142156	down4h
114825	-0.114992	3.83193	0.659381		-1.41867	3.83193	0.000225074	down4h
114879	0.119349	2.93155	0.598068		-1.69599	2.93155	2.38352e-05	down4h
114885	0.0674156	6.52223	0.810987		-1.38221	6.52223	0.000349089	down4h
114932	-0.488687	3.84753	0.0337255		-2.47059	3.84753	1.13793e-07	down4h
115196	0.171944	-0.495372	0.669292		-1.38151	-0.495372	0.00970277	down4h
115207	-0.0927205	5.63962	0.671113		-3.68261	5.63962	2.83091e-09	down4h
115416	-0.171903	1.77074	0.566025		-1.22297	1.77074	0.00604595	down4h
115426	-0.0104731	3.18682	0.974429		-2.13403	3.18682	6.0548e-05	down4h
115509	0.54817	-0.194738	0.148912		-1.16578	-0.194738	0.0341343	down4h
115548	-0.0516492	5.65466	0.876643		-1.19583	5.65466	0.00369282	down4h
115761	0.108768	5.78086	0.560398		-1.82926	5.78086	4.3585e-07	down4h
115825	0.341301	4.62551	0.122562		-1.55293	4.62551	1.325e-05	down4h
115992	0.000608274	7.81694	0.997102		-1.02088	7.81694	4.51614e-05	down4h
116138	-0.253832	4.1953	0.243541		-1.29609	4.1953	6.65879e-05	down4h
116224	-0.28316	3.03244	0.218546		-2.23955	3.03244	1.02787e-06	down4h
116369	0.0219331	3.76354	0.912563		-1.70281	3.76354	3.558e-06	down4h
116534	-0.248985	-0.388646	0.572515		-1.43476	-0.388646	0.032672	down4h
117178	-0.136872	0.0808278	0.666809		-1.38696	0.0808278	0.00911374	down4h
117854	0.037624	-0.00515487	0.918143		-2.0676	-0.00515487	0.000559663	down4h
1182	0.122672	2.64965	0.697534		-1.20114	2.64965	0.00500852	down4h
1183	0.0958077	2.44504	0.678212		-1.21395	2.44504	0.000477097	down4h
118429	-0.0390176	7.3926	0.836219		-1.28446	7.3926	1.64876e-05	down4h
118490	-0.251849	0.310906	0.394736		-1.26279	0.310906	0.00572771	down4h
118987	0.248018	5.80255	0.395532		-3.40308	5.80255	1.57688e-07	down4h
119016	-0.00711422	4.17755	0.970353		-1.99358	4.17755	3.84419e-07	down4h
119385	-0.369131	0.57305	0.206685		-2.04283	0.57305	0.000207482	down4h
119391	-0.732252	-1.17379	0.183032		-2.74201	-1.17379	0.0273048	down4h
120224	0.0149169	2.74323	0.950042		-1.22004	2.74323	0.000400538	down4h
121268	-0.54515	-1.32207	0.362204		-6.49802	-1.32207	0.00230226	down4h
121355	1.1313	-1.77553	0.18035		-5.76903	-1.77553	0.0233833	down4h
121457	-0.261174	5.4068	0.244709		-1.88933	5.4068	2.24918e-06	down4h
121506	0.188474	1.42294	0.389935		-2.09793	1.42294	3.08483e-05	down4h
121551	0.0750722	3.29658	0.737277		-1.1102	3.29658	0.000663911	down4h
122402	0.582178	0.197778	0.120609		-1.78822	0.197778	0.00311621	down4h
122525	-0.405436	0.422347	0.281927		-1.29212	0.422347	0.0211715	down4h
122618	-0.000203143	0.804382	0.999501		-1.77933	0.804382	0.00284491	down4h
122945	0.350385	0.172559	0.302783		-1.22005	0.172559	0.0154525	down4h
122953	-0.027347	5.87125	0.886096		-1.97161	5.87125	2.96986e-07	down4h
122961	-0.285286	1.53715	0.376614		-1.94714	1.53715	0.000499007	down4h
1230	-0.111338	8.06015	0.542413		-1.30419	8.06015	9.5845e-06	down4h
123016	-0.233775	-0.458955	0.571073		-1.67651	-0.458955	0.0318848	down4h
123041	0.109347	3.81523	0.70848		-3.38652	3.81523	2.95824e-07	down4h
1232	-0.22858	5.51868	0.266348		-1.74835	5.51868	1.51656e-06	down4h
123207	-0.195216	0.640992	0.585148		-1.44988	0.640992	0.00573161	down4h
1241	-0.162762	7.02368	0.420106		-2.73617	7.02368	1.55177e-08	down4h
124222	0.0236647	0.0798835	0.935897		-7.20481	0.0798835	6.54339e-05	down4h
124454	0.522611	-1.00519	0.258874		-1.60706	-1.00519	0.0477804	down4h
124599	-0.116298	6.35276	0.530125		-4.44319	6.35276	6.12149e-11	down4h
124783	0.871519	-1.60945	0.230129		-2.96621	-1.60945	0.0221608	down4h
124808	-0.0307456	0.12914	0.927017		-1.33517	0.12914	0.0227604	down4h
124995	-0.36869	2.03335	0.226783		-1.06407	2.03335	0.00525478	down4h
124997	0.00485564	2.45046	0.985724		-1.9699	2.45046	4.58234e-05	down4h
125150	-0.183477	0.302942	0.63485		-1.27031	0.302942	0.0353083	down4h
125170	0.124358	0.808527	0.643509		-3.19341	0.808527	2.8997e-05	down4h
125893	-0.438678	0.115958	0.231985		-1.5029	0.115958	0.00564859	down4h
126070	-0.087394	1.92527	0.698588		-1.3737	1.92527	0.000219647	down4h
126074	-0.667773	1.28585	0.0339861		-2.70645	1.28585	4.41064e-05	down4h
1262	0.0870852	-1.45457	0.874609		-5.6706	-1.45457	0.00976205	down4h
126272	0.14031	-1.1165	0.810838		-3.60631	-1.1165	0.00446791	down4h
126364	-0.162253	8.47311	0.359616		-2.09523	8.47311	4.65342e-08	down4h
126382	0.25911	-0.270427	0.483462		-1.20391	-0.270427	0.0460857	down4h
126432	-0.153527	4.29736	0.429621		-1.48517	4.29736	6.69176e-06	down4h
126731	0.0198773	4.27545	0.923326		-2.66387	4.27545	6.42768e-08	down4h
126868	0.470175	1.39208	0.253977		-2.26023	1.39208	0.00203736	down4h
127262	-0.0611413	6.28335	0.749293		-1.66832	6.28335	1.51564e-06	down4h
127428	0.106716	2.54211	0.61079		-1.22813	2.54211	0.000140763	down4h
127933	0.0656826	4.75779	0.867562		-1.43589	4.75779	0.00377765	down4h
127943	0.0334277	-1.24007	0.953318		-2.1066	-1.24007	0.0435001	down4h
128061	-0.165553	1.05817	0.602325		-1.95469	1.05817	0.000231419	down4h
128077	-0.046426	2.23331	0.858115		-1.76871	2.23331	9.54257e-05	down4h
1282	0.372918	0.00432763	0.31917		-1.71276	0.00432763	0.00538615	down4h
128272	0.549538	-1.09271	0.27696		-5.85855	-1.09271	0.00747476	down4h
128439	0.85902	-1.52888	0.259972		-5.8717	-1.52888	0.0236941	down4h
128646	0.264997	3.05682	0.343596		-1.80122	3.05682	6.01257e-05	down4h
128710	0.348267	0.402457	0.350076		-1.63461	0.402457	0.0109568	down4h
128977	-0.0896291	2.91174	0.685006		-1.17987	2.91174	0.000358473	down4h
128989	-0.0305237	5.51937	0.870088		-1.22103	5.51937	2.72073e-05	down4h
129138	0.30572	0.575155	0.404502		-2.05241	0.575155	0.00213462	down4h
129303	-0.107236	-0.258206	0.799715		-1.75633	-0.258206	0.0226995	down4h
129685	0.160847	3.88121	0.443104		-2.17533	3.88121	4.11149e-07	down4h
130074	0.0283189	5.8035	0.890761		-1.50758	5.8035	9.93775e-06	down4h
130535	-0.174206	2.59378	0.610678		-2.26681	2.59378	0.000160807	down4h
130589	-0.0498214	2.02713	0.822758		-3.32276	2.02713	1.33743e-07	down4h
130814	-0.559407	1.2921	0.0784721		-1.05843	1.2921	0.0181278	down4h
130872	0.16649	4.10266	0.43617		-1.51755	4.10266	1.6004e-05	down4h
131450	-0.0199902	-1.43087	0.973814		-2.8181	-1.43087	0.0273346	down4h
131583	-0.0734018	3.16691	0.745525		-1.2364	3.16691	0.000181992	down4h
1316	-0.16477	8.5517	0.426828		-1.03216	8.5517	0.00025109	down4h
131870	-0.0683854	4.89764	0.713487		-3.72893	4.89764	6.8465e-10	down4h
132160	-0.0675766	6.52982	0.716684		-2.47249	6.52982	1.9796e-08	down4h
132241	-0.0357379	2.76451	0.874315		-1.33669	2.76451	0.000125886	down4h
132864	-0.0289088	5.52609	0.910824		-2.67723	5.52609	4.927e-07	down4h
132949	0.176894	-0.118045	0.720471		-1.64913	-0.118045	0.0282178	down4h
133522	0.0623706	-0.920981	0.892781		-2.58116	-0.920981	0.0370259	down4h
134266	-0.854425	0.123256	0.0315229		-2.44315	0.123256	0.000196176	down4h
134553	-0.147672	1.74586	0.560211		-1.83153	1.74586	4.59363e-05	down4h
1355	-0.0295366	3.62775	0.891766		-1.9763	3.62775	1.85273e-06	down4h
135927	-0.294827	0.503044	0.33097		-3.23869	0.503044	3.22831e-05	down4h
136227	-1.42171	-2.21601	0.24818		-5.57146	-2.21601	0.0437393	down4h
136647	-0.311316	1.58254	0.341072		-1.00508	1.58254	0.0132672	down4h
1374	0.117771	3.31522	0.590046		-1.53788	3.31522	2.10566e-05	down4h
1376	-0.288252	2.78966	0.187919		-1.33879	2.78966	0.000122403	down4h
137994	0.316081	2.83097	0.13952		-3.27649	2.83097	1.1566e-08	down4h
138151	0.299548	5.50591	0.212863		-3.43536	5.50591	1.36277e-08	down4h
139231	0.125549	3.73444	0.691652		-2.20139	3.73444	3.40339e-05	down4h
139341	-0.16344	1.11572	0.626461		-1.18899	1.11572	0.00617897	down4h
139716	0.00936971	5.0014	0.96103		-2.7031	5.0014	1.63793e-08	down4h
139735	0.554891	-0.795567	0.302478		-3.80735	-0.795567	0.00291001	down4h
1399	0.000861166	6.38728	0.996525		-1.73987	6.38728	1.41001e-06	down4h
140	-0.00517775	0.396985	0.98552		-2.6491	0.396985	4.96968e-05	down4h
140459	0.200234	3.96994	0.337033		-1.54716	3.96994	1.06428e-05	down4h
140460	0.0506723	3.87881	0.794864		-1.45948	3.87881	9.97264e-06	down4h
140461	-0.17039	5.18944	0.46461		-1.0075	5.18944	0.000907111	down4h
140707	0.267866	1.96139	0.28828		-2.37225	1.96139	5.50221e-06	down4h
140710	0.858991	0.488412	0.0363348		-1.29196	0.488412	0.0177783	down4h
140775	0.188565	6.73717	0.635945		-2.50452	6.73717	5.34442e-05	down4h
1408	0.0255651	3.03342	0.904561		-1.28112	3.03342	0.000176439	down4h
140831	0.287916	1.41489	0.32177		-1.59208	1.41489	0.00136374	down4h
143	0.096131	6.97566	0.678462		-2.76516	6.97566	7.21741e-08	down4h
143384	0.0828632	7.01257	0.664956		-1.91957	7.01257	3.57072e-07	down4h
1434	-0.124255	2.21287	0.55986		-1.83463	2.21287	7.61161e-06	down4h
1436	0.0042313	6.1696	0.981553		-1.28411	6.1696	1.2949e-05	down4h
143686	0.453065	2.76619	0.153862		-2.8538	2.76619	4.19131e-06	down4h
143888	0.0619702	-1.55634	0.925985		-5.76309	-1.55634	0.0171719	down4h
144097	0.885386	-0.423578	0.0593601		-1.60737	-0.423578	0.00483807	down4h
144195	0.0826024	4.98324	0.764693		-1.71019	4.98324	8.07822e-05	down4h
144715	0.0723201	-1.93818	0.926078		-5.86155	-1.93818	0.0101285	down4h
145553	0.0625535	1.10908	0.818345		-1.04421	1.10908	0.0107541	down4h
1457	-0.146812	3.49211	0.492824		-1.39872	3.49211	4.35231e-05	down4h
145814	1.17313	-1.85033	0.188075		-6.3847	-1.85033	0.00394174	down4h
146059	0.170892	2.12074	0.556652		-2.14574	2.12074	5.01537e-05	down4h
146223	-0.196627	1.34692	0.419808		-1.80914	1.34692	0.000124177	down4h
146439	0.0256797	1.58734	0.917917		-1.2606	1.58734	0.00196149	down4h
1465	-0.244163	1.89431	0.322663		-1.17534	1.89431	0.00290813	down4h
146540	0.224173	-0.838262	0.67336		-1.64808	-0.838262	0.0180138	down4h
146542	-0.187734	1.36009	0.542905		-1.30919	1.36009	0.00908498	down4h
146547	-0.264162	0.950411	0.346332		-1.31277	0.950411	0.0045462	down4h
146712	0.344427	4.47976	0.106781		-1.19315	4.47976	8.91407e-05	down4h
146722	-0.0502341	6.23511	0.809257		-2.91888	6.23511	1.28723e-08	down4h
146923	0.153426	4.65795	0.420619		-2.71782	4.65795	1.03844e-08	down4h
147007	-0.0188526	3.05586	0.927312		-1.17099	3.05586	0.000160534	down4h
147138	0.116338	6.52964	0.532922		-2.62429	6.52964	9.95463e-09	down4h
147407	-0.684112	-1.75993	0.392003		-5.57567	-1.75993	0.0309069	down4h
147807	-0.039296	2.40231	0.889574		-1.60416	2.40231	0.000403201	down4h
147991	-0.0164429	4.65806	0.9581		-1.54844	4.65806	0.000412719	down4h
148137	0.0685682	2.58588	0.74571		-1.34015	2.58588	0.000173115	down4h
148229	0.490124	0.411919	0.130468		-2.52367	0.411919	0.000397957	down4h
148413	0.166418	1.89771	0.541969		-1.39693	1.89771	0.000666422	down4h
148479	-0.229339	3.69402	0.303189		-3.2358	3.69402	3.69619e-08	down4h
148823	-0.630362	-1.01601	0.274188		-1.68551	-1.01601	0.0434014	down4h
149076	0.0852239	3.00109	0.697937		-3.52707	3.00109	2.63739e-08	down4h
149428	-0.431275	0.202471	0.201843		-2.97934	0.202471	0.000112352	down4h
149837	0.213161	2.03039	0.53992		-1.3347	2.03039	0.0024328	down4h
149840	0.096848	-0.581241	0.840258		-2.3535	-0.581241	0.00140463	down4h
149986	0.0275176	4.15637	0.889972		-1.88489	4.15637	1.15432e-06	down4h
150165	-0.497973	-1.51545	0.492303		-5.57934	-1.51545	0.0351862	down4h
150223	-0.074779	1.2359	0.77802		-1.55044	1.2359	0.000599953	down4h
150290	0.080042	4.04841	0.701267		-2.66261	4.04841	6.30927e-08	down4h
150383	-1.31455	-1.73189	0.113624		-2.74632	-1.73189	0.0400606	down4h
150737	-0.518094	-0.815461	0.28063		-6.55204	-0.815461	0.00190446	down4h
150776	0.0390154	2.59257	0.851173		-1.13876	2.59257	0.000392255	down4h
150864	-0.0566278	1.34912	0.821665		-1.4856	1.34912	0.00103134	down4h
151056	0.148891	5.29129	0.502989		-1.08651	5.29129	0.00037169	down4h
151188	-0.202979	2.54148	0.325131		-1.67447	2.54148	1.4455e-05	down4h
151295	0.367498	0.175847	0.233246		-1.37808	0.175847	0.0033526	down4h
1513	-0.115753	1.91522	0.623767		-1.07085	1.91522	0.00254613	down4h
151393	-0.71203	0.684368	0.0356361		-1.40116	0.684368	0.00359929	down4h
151556	-0.0213618	5.07377	0.912506		-2.02318	5.07377	3.52823e-07	down4h
151613	-0.110841	3.36636	0.59121		-1.03246	3.36636	0.000363243	down4h
1519	-0.216527	-0.0905862	0.558625		-1.68019	-0.0905862	0.0120545	down4h
152006	-0.00984762	5.73151	0.963269		-1.80715	5.73151	2.39237e-06	down4h
152185	0.330623	1.02271	0.299731		-1.01247	1.02271	0.0239223	down4h
152195	-0.00970901	2.067	0.972615		-5.67279	2.067	1.06314e-07	down4h
152217	-0.554147	1.10064	0.110552		-1.86739	1.10064	0.00119495	down4h
152518	-0.0118473	4.98908	0.958789		-1.23087	4.98908	0.000161468	down4h
152815	0.00609251	2.67284	0.975936		-1.13657	2.67284	0.000194842	down4h
153222	0.0348692	7.29696	0.910682		-1.3118	7.29696	0.00111661	down4h
153241	-0.116419	2.84969	0.649148		-1.5341	2.84969	0.000191205	down4h
1534	-0.0900584	3.11502	0.724651		-1.27567	3.11502	0.000471255	down4h
153684	0.238021	0.413309	0.55229		-1.50154	0.413309	0.0102529	down4h
154007	-0.185574	2.76235	0.478144		-1.99855	2.76235	2.22707e-05	down4h
1545	-0.542221	0.0664677	0.0961787		-3.60716	0.0664677	0.000740278	down4h
154761	-0.0625501	1.74706	0.853299		-1.78856	1.74706	0.000980836	down4h
154881	-0.17403	2.36592	0.414568		-1.52013	2.36592	0.000149468	down4h
155038	-0.30692	3.30272	0.236856		-1.76817	3.30272	1.92788e-05	down4h
155054	-0.300173	-0.809978	0.608452		-2.10747	-0.809978	0.0186988	down4h
155061	0.0764961	7.10486	0.663742		-2.06676	7.10486	6.0204e-08	down4h
155400	-0.646234	0.946354	0.0467479		-1.34371	0.946354	0.00171394	down4h
155435	0.241445	7.17085	0.380813		-1.93922	7.17085	1.24236e-05	down4h
157247	-0.041496	1.21238	0.873929		-1.72683	1.21238	0.000206791	down4h
157285	-0.728659	-0.872745	0.211306		-1.99756	-0.872745	0.0417475	down4h
157378	0.102048	3.34668	0.650241		-1.68234	3.34668	1.9163e-05	down4h
157506	0.0792093	-0.240542	0.837882		-1.34671	-0.240542	0.0344088	down4h
157567	-0.142769	-0.984205	0.805023		-1.72129	-0.984205	0.0481625	down4h
157922	0.211834	2.21717	0.451927		-2.01252	2.21717	9.90279e-05	down4h
157983	-0.53984	1.78756	0.049666		-3.26263	1.78756	5.52785e-06	down4h
159	-0.125033	4.3669	0.521479		-2.55611	4.3669	3.74781e-08	down4h
159013	-0.0173234	5.75715	0.923813		-2.1726	5.75715	6.08534e-08	down4h
160364	-0.256711	6.70551	0.214102		-1.35714	6.70551	1.80407e-05	down4h
1605	0.0410047	1.79586	0.875067		-1.9883	1.79586	0.000693383	down4h
160760	0.207656	5.66564	0.572048		-1.67694	5.66564	0.000668675	down4h
1608	0.220608	3.37408	0.391307		-1.25793	3.37408	0.000889608	down4h
1609	0.139332	4.01481	0.50358		-1.57775	4.01481	1.21582e-05	down4h
161582	-0.67895	0.208421	0.0307013		-1.38779	0.208421	0.0152527	down4h
161742	0.216445	0.399635	0.484374		-1.5066	0.399635	0.00694879	down4h
162466	0.0110285	8.44576	0.952186		-2.5682	8.44576	1.09158e-08	down4h
1628	-0.256835	0.81816	0.306315		-1.56614	0.81816	0.00067109	down4h
1629	-0.211183	1.29161	0.457847		-2.72169	1.29161	4.82281e-06	down4h
162962	0.0276218	1.23646	0.93423		-1.73486	1.23646	0.00174587	down4h
162967	-0.0913584	0.110561	0.776331		-1.30173	0.110561	0.012061	down4h
162979	0.118686	1.3788	0.618502		-1.14973	1.3788	0.00534807	down4h
163049	-0.217898	3.12638	0.295981		-1.63105	3.12638	9.15076e-06	down4h
163050	-0.227831	2.76952	0.284035		-2.75439	2.76952	1.38971e-07	down4h
163087	-0.300302	-0.071814	0.374021		-1.04409	-0.071814	0.0311667	down4h
1633	-0.225472	2.69587	0.273034		-1.24214	2.69587	9.94538e-05	down4h
163351	0.012164	1.37167	0.958809		-1.50079	1.37167	0.000176047	down4h
163590	0.101671	4.92537	0.78847		-1.10502	4.92537	0.0137267	down4h
163786	-0.376702	0.781706	0.227147		-1.79817	0.781706	0.000310743	down4h
163859	0.112259	5.26069	0.597781		-1.71688	5.26069	4.95804e-06	down4h
164091	-0.0562033	2.10048	0.814		-1.87322	2.10048	1.47721e-05	down4h
1643	-0.240562	0.398266	0.425679		-1.04023	0.398266	0.0187184	down4h
165140	-0.233303	4.23017	0.236112		-3.48251	4.23017	2.09816e-09	down4h
165530	-0.352668	-1.50586	0.626594		-6.89918	-1.50586	0.000942575	down4h
166012	0.294037	2.17652	0.226871		-3.71226	2.17652	6.23434e-08	down4h
167465	0.283447	-0.0344984	0.50582		-1.17069	-0.0344984	0.035372	down4h
1677	-0.0415615	1.16844	0.878979		-1.7139	1.16844	0.000181059	down4h
169693	-0.214844	1.80419	0.340318		-2.98541	1.80419	1.92493e-07	down4h
169841	-0.0474899	0.394714	0.891825		-1.05307	0.394714	0.0323186	down4h
169981	-1.16577	-1.4287	0.0760896		-2.10342	-1.4287	0.0338526	down4h
170082	0.0462354	0.955007	0.854092		-1.94473	0.955007	8.50039e-05	down4h
170371	0.185589	2.95097	0.413846		-3.01997	2.95097	6.14699e-08	down4h
170482	0.786114	-1.54415	0.252661		-3.20942	-1.54415	0.00911146	down4h
170591	0.195151	0.636765	0.560532		-3.33836	0.636765	1.279e-05	down4h
170960	0.133556	3.16256	0.535741		-1.98069	3.16256	1.91932e-06	down4h
171017	-0.0038418	5.50906	0.984246		-1.14731	5.50906	7.16976e-05	down4h
171389	0.0524955	5.83412	0.786198		-4.14985	5.83412	2.51639e-10	down4h
171586	-0.223023	5.79322	0.258452		-1.26448	5.79322	2.45745e-05	down4h
172	0.109415	2.19981	0.653213		-1.04746	2.19981	0.00274992	down4h
1736	0.13037	2.39886	0.528798		-1.4842	2.39886	4.9101e-05	down4h
1756	0.167323	-2.5562	0.932375		-5.76526	-2.5562	0.0330714	down4h
1773	0.289796	1.8179	0.260341		-1.35232	1.8179	0.000459607	down4h
1777	-0.0738672	3.88854	0.702468		-3.30795	3.88854	3.10186e-09	down4h
1778	0.347213	6.32555	0.37439		-1.80069	6.32555	0.000581253	down4h
178	-0.0919952	2.36971	0.767527		-1.05855	2.36971	0.00865343	down4h
1783	0.041012	5.18101	0.833543		-1.03574	5.18101	0.000178832	down4h
18	0.088753	6.00641	0.684624		-1.33851	6.00641	4.96023e-05	down4h
1810	-0.112012	5.07067	0.628056		-1.17784	5.07067	0.000256125	down4h
1831	-0.218661	9.09013	0.263319		-2.85254	9.09013	5.35094e-09	down4h
1836	-0.0435489	1.2276	0.882901		-1.31531	1.2276	0.00377543	down4h
1849	-0.342459	2.60281	0.132237		-3.88592	2.60281	1.60845e-08	down4h
1856	0.0187569	2.91184	0.931622		-1.69634	2.91184	1.0985e-05	down4h
1877	0.14544	3.79446	0.501662		-1.42372	3.79446	5.05023e-05	down4h
1912	-0.0105176	9.39303	0.945913		-1.86523	9.39303	4.24921e-08	down4h
192670	0.0944423	8.13341	0.762726		-2.03848	8.13341	3.08431e-05	down4h
1955	0.0358589	9.53187	0.894382		-1.01637	9.53187	0.00242331	down4h
196264	0.318082	5.47144	0.434388		-1.10792	5.47144	0.0179078	down4h
197259	0.0530333	6.62981	0.766283		-1.31832	6.62981	7.42735e-06	down4h
1978	-0.142287	0.689564	0.68849		-1.08259	0.689564	0.024439	down4h
199692	-0.374179	1.60361	0.157099		-1.47936	1.60361	0.00141209	down4h
1997	0.0216376	7.98749	0.925951		-1.27554	7.98749	0.00012948	down4h
199745	0.166031	-0.269149	0.656448		-1.94015	-0.269149	0.00524846	down4h
199777	0.488088	0.700455	0.180574		-1.33076	0.700455	0.00835826	down4h
199870	-0.0156651	1.2445	0.958866		-1.30008	1.2445	0.00139036	down4h
1999	0.284602	-0.273958	0.468389		-1.97339	-0.273958	0.00588275	down4h
2004	-0.121933	1.45892	0.644248		-1.97728	1.45892	6.38383e-05	down4h
200576	0.296317	6.0963	0.572696		-1.50596	6.0963	0.0141504	down4h
200634	-0.322978	-1.04805	0.551275		-3.2122	-1.04805	0.0112577	down4h
200772	-0.439492	1.77126	0.0822941		-1.10324	1.77126	0.0014928	down4h
200942	-0.207817	4.6673	0.394981		-3.01203	4.6673	4.60776e-08	down4h
201163	0.0885367	5.63426	0.703791		-1.74215	5.63426	7.25528e-06	down4h
201164	-0.145401	0.273131	0.654626		-1.30202	0.273131	0.00406699	down4h
201175	0.287945	4.86511	0.202274		-1.75813	4.86511	4.23164e-06	down4h
201176	0.124477	8.6208	0.465319		-1.31589	8.6208	4.04003e-06	down4h
201229	-0.542908	0.400629	0.0676529		-1.42038	0.400629	0.00731031	down4h
201627	0.0106276	4.02685	0.962186		-2.00353	4.02685	2.83227e-06	down4h
201973	-0.146776	0.998272	0.673886		-1.5767	0.998272	0.00474969	down4h
202020	0.118644	-0.402309	0.757906		-2.29369	-0.402309	0.00212267	down4h
202181	-0.0332243	1.00919	0.924411		-1.71978	1.00919	0.00253024	down4h
202243	0.0894479	4.80235	0.633159		-3.3731	4.80235	1.26339e-09	down4h
203069	0.00972294	1.84371	0.971502		-1.21281	1.84371	0.00322574	down4h
203259	-0.0489877	4.19558	0.797756		-1.03501	4.19558	0.000182399	down4h
203523	0.347755	-0.599719	0.463374		-1.74376	-0.599719	0.0217867	down4h
2050	0.0737816	5.4991	0.700256		-2.17269	5.4991	1.40021e-07	down4h
2051	0.0914984	3.54727	0.649928		-1.29828	3.54727	7.96139e-05	down4h
2054	0.154922	0.883744	0.604473		-1.07542	0.883744	0.0170262	down4h
205428	-0.281207	1.61966	0.246492		-1.67533	1.61966	7.31584e-05	down4h
2055	0.0828509	2.86112	0.696341		-1.80082	2.86112	1.79794e-05	down4h
2057	-0.227607	3.78706	0.255137		-2.7623	3.78706	3.48118e-08	down4h
206358	0.206577	5.64521	0.411963		-2.10342	5.64521	2.61593e-06	down4h
206412	0.100859	0.750626	0.733515		-1.62929	0.750626	0.000279529	down4h
2071	0.0354924	2.87343	0.870292		-1.81035	2.87343	8.14446e-06	down4h
2072	-0.304493	-0.132057	0.441554		-2.38154	-0.132057	0.000568463	down4h
2073	-0.0775804	4.67463	0.699728		-1.79272	4.67463	1.70761e-06	down4h
2074	0.237313	3.44116	0.399876		-2.23647	3.44116	9.10051e-06	down4h
2081	0.452533	6.78546	0.350664		-2.26741	6.78546	0.000590746	down4h
210	-0.259895	1.67048	0.308753		-1.44403	1.67048	0.000623569	down4h
2123	-0.378308	7.66824	0.0777863		-1.71189	7.66824	1.80295e-06	down4h
2124	-0.24496	9.9938	0.136769		-1.6707	9.9938	1.56232e-07	down4h
2137	0.0313852	7.17693	0.883657		-1.90401	7.17693	1.34383e-06	down4h
215	0.111365	3.82909	0.579493		-1.63707	3.82909	5.17925e-06	down4h
2150	-0.0774701	5.86801	0.679318		-5.15971	5.86801	2.31742e-11	down4h
2175	0.170768	4.24619	0.387683		-2.40364	4.24619	6.42909e-08	down4h
2178	-0.182172	-0.738019	0.74682		-2.07518	-0.738019	0.0216524	down4h
2186	0.315683	6.53479	0.258872		-1.14029	6.53479	0.00117767	down4h
2189	0.146051	0.35478	0.648631		-1.39218	0.35478	0.00863592	down4h
219402	-0.17103	3.13583	0.53894		-1.66305	3.13583	0.000116815	down4h
219654	-0.00724218	1.87378	0.976667		-1.91706	1.87378	4.36482e-05	down4h
219749	-0.244953	0.370911	0.492188		-1.96382	0.370911	0.00264686	down4h
219771	-0.197378	7.18965	0.272733		-1.58447	7.18965	9.84949e-07	down4h
219855	0.194088	1.984	0.375432		-1.6077	1.984	3.69157e-05	down4h
220042	-0.183055	0.817891	0.640102		-3.11711	0.817891	0.000260726	down4h
220064	-0.0457267	1.71561	0.837766		-1.60071	1.71561	7.52181e-05	down4h
220213	-0.146682	4.84273	0.457513		-3.02904	4.84273	6.39891e-09	down4h
220359	-0.242902	4.01494	0.266356		-5.66968	4.01494	3.45003e-10	down4h
2205	-0.630685	-0.144134	0.157373		-1.74469	-0.144134	0.0118544	down4h
220729	0.0244435	1.42978	0.925589		-2.54983	1.42978	6.69494e-06	down4h
220869	-0.112571	4.34183	0.623018		-1.27889	4.34183	0.00017808	down4h
220972	0.0887108	6.05566	0.811531		-1.6523	6.05566	0.0008861	down4h
221	-0.0261613	4.45502	0.899972		-1.60665	4.45502	7.54391e-06	down4h
221002	-0.0537415	2.31779	0.802215		-1.53005	2.31779	5.3383e-05	down4h
221037	0.215391	9.29103	0.510058		-2.09945	9.29103	3.40553e-05	down4h
221092	-0.138033	6.22517	0.454163		-2.04692	6.22517	1.15132e-07	down4h
221120	-0.293921	-0.920686	0.535044		-1.71865	-0.920686	0.0222857	down4h
221178	0.0318866	6.6251	0.901829		-1.01567	6.6251	0.00190018	down4h
2214	-0.0299443	9.9827	0.854123		-1.2226	9.9827	5.84081e-06	down4h
221496	0.0667414	4.97206	0.724603		-1.24707	4.97206	2.79672e-05	down4h
2215	-0.13195	12.0589	0.3366		-1.21151	12.0589	8.61846e-07	down4h
221545	-0.309906	0.52952	0.324372		-1.87055	0.52952	0.000702139	down4h
221785	0.118524	2.59057	0.56883		-1.42102	2.59057	4.95395e-05	down4h
221914	0.344061	0.921891	0.246567		-1.36189	0.921891	0.00391707	down4h
221937	0.214928	3.21187	0.526603		-1.64658	3.21187	0.000868596	down4h
222161	-0.149297	2.24305	0.556405		-1.98263	2.24305	3.90749e-05	down4h
222166	-0.242275	4.7105	0.25109		-1.95355	4.7105	9.18711e-07	down4h
222194	-0.144812	5.67937	0.581768		-1.99132	5.67937	6.99779e-06	down4h
222234	-0.408077	-0.0254372	0.291359		-2.47073	-0.0254372	0.000880881	down4h
222389	-0.288017	1.82006	0.229435		-1.23576	1.82006	0.000854463	down4h
222484	-0.000270845	1.1362	0.999352		-3.20458	1.1362	0.00029546	down4h
223	-0.152751	4.96468	0.42259		-1.10957	4.96468	6.97484e-05	down4h
223082	0.0199269	3.65598	0.921032		-1.37981	3.65598	3.16006e-05	down4h
2232	0.158068	-0.323352	0.730932		-2.42452	-0.323352	0.0117368	down4h
224	-0.550215	0.282003	0.120268		-1.60974	0.282003	0.00579393	down4h
2242	0.00448586	6.37431	0.982524		-2.98678	6.37431	9.20571e-09	down4h
2264	-0.247561	-0.422397	0.547125		-1.88737	-0.422397	0.00822735	down4h
22803	-0.0476193	6.74906	0.815972		-1.86932	6.74906	9.82272e-07	down4h
22806	0.627592	0.109977	0.124783		-1.94497	0.109977	0.00320823	down4h
22820	0.06468	5.88517	0.725035		-1.20267	5.88517	2.57055e-05	down4h
22821	0.0833207	5.22637	0.694936		-1.28454	5.22637	5.4987e-05	down4h
22832	-0.23781	1.97505	0.302474		-1.17253	1.97505	0.000742713	down4h
22834	-0.0609633	6.74208	0.742645		-2.86448	6.74208	4.00214e-09	down4h
22838	-0.00828424	7.88055	0.977307		-2.09709	7.88055	1.20974e-05	down4h
22841	0.252202	3.09542	0.345589		-1.83999	3.09542	4.04667e-05	down4h
22847	-0.000217589	2.56779	0.999418		-3.4428	2.56779	1.06911e-06	down4h
22848	0.146748	5.07521	0.485874		-1.07462	5.07521	0.00025023	down4h
22849	0.11928	2.13337	0.578942		-4.19337	2.13337	2.19424e-08	down4h
22853	0.308635	6.56864	0.43303		-2.72346	6.56864	2.23234e-05	down4h
22858	0.133591	1.53513	0.640707		-1.57221	1.53513	0.00120146	down4h
22869	0.0124465	0.0168517	0.974016		-1.2226	0.0168517	0.0292551	down4h
22876	0.14961	0.839826	0.646745		-1.17728	0.839826	0.013507	down4h
22877	0.213862	5.0782	0.331885		-2.05557	5.0782	8.72399e-07	down4h
22878	0.0282709	6.08642	0.921179		-1.1664	6.08642	0.00144646	down4h
22884	-0.0408591	4.60112	0.874007		-3.02859	4.60112	2.13861e-07	down4h
22898	0.197727	9.51208	0.334514		-1.30142	9.51208	2.60653e-05	down4h
22900	-0.0243158	7.98374	0.903082		-1.80255	7.98374	1.01855e-06	down4h
22905	0.158753	2.49018	0.4654		-2.14846	2.49018	5.09572e-06	down4h
22908	-0.0921104	4.41336	0.701564		-2.50155	4.41336	4.35971e-07	down4h
22911	-0.117625	3.9962	0.640887		-1.00803	3.9962	0.00230188	down4h
22918	0.0537046	8.01804	0.855976		-3.24256	8.01804	2.29353e-07	down4h
22928	-0.260747	4.61732	0.203452		-2.99483	4.61732	1.11325e-08	down4h
22929	-0.204401	-0.132171	0.57769		-1.11478	-0.132171	0.0473852	down4h
22937	0.0557536	6.7269	0.748759		-1.92151	6.7269	1.2262e-07	down4h
22950	-0.169681	3.47761	0.39724		-1.13018	3.47761	0.000137189	down4h
22973	0.208715	-1.14041	0.778949		-6.55037	-1.14041	0.015155	down4h
22976	-0.350216	1.5902	0.221399		-1.02045	1.5902	0.0111452	down4h
22978	-0.0718478	7.8752	0.669261		-1.24715	7.8752	6.53334e-06	down4h
22995	0.15144	0.973829	0.602169		-1.30318	0.973829	0.00342454	down4h
23005	0.173327	3.07062	0.535634		-1.35893	3.07062	0.000719681	down4h
23008	-0.170001	3.46976	0.436242		-1.93997	3.46976	2.34438e-06	down4h
23012	-0.00717958	5.89067	0.973136		-1.49534	5.89067	1.40078e-05	down4h
23013	0.43172	7.90125	0.368006		-3.14321	7.90125	3.8801e-05	down4h
23030	0.194116	8.11533	0.34351		-1.15775	8.11533	7.87154e-05	down4h
23031	0.198373	9.02722	0.408993		-1.41122	9.02722	5.95865e-05	down4h
23032	-0.161556	4.86147	0.46202		-1.55398	4.86147	1.21191e-05	down4h
23033	0.312689	2.29719	0.520257		-1.50715	2.29719	0.0212233	down4h
23037	0.507668	-2.39373	0.652841		-5.45706	-2.39373	0.0313079	down4h
23039	-0.0862915	4.83219	0.718701		-1.96053	4.83219	4.06059e-06	down4h
23046	0.421394	7.56784	0.234123		-2.13074	7.56784	5.28303e-05	down4h
23051	0.322276	-0.445986	0.47754		-2.33105	-0.445986	0.011475	down4h
23054	0.207667	6.40769	0.43902		-1.51478	6.40769	9.53111e-05	down4h
23067	0.344291	7.60842	0.328434		-2.15489	7.60842	4.79758e-05	down4h
2308	0.175836	4.78647	0.468122		-2.36845	4.78647	8.62145e-07	down4h
23080	0.304514	4.9092	0.300926		-1.54755	4.9092	0.000186245	down4h
2309	0.212796	7.90535	0.407587		-1.13132	7.90535	0.000700275	down4h
23096	0.693336	-0.415721	0.106274		-4.57725	-0.415721	5.34018e-05	down4h
23097	0.0210598	6.67481	0.930168		-1.53198	6.67481	3.57091e-05	down4h
23098	-0.266757	0.493377	0.419314		-1.82241	0.493377	0.00182177	down4h
23099	0.047835	3.21403	0.865477		-1.17164	3.21403	0.00196469	down4h
2310	0.247308	5.69129	0.382198		-1.30922	5.69129	0.000548093	down4h
23108	0.285858	7.76248	0.286286		-1.35528	7.76248	0.000210781	down4h
23116	-0.0809402	0.923013	0.774335		-1.39587	0.923013	0.00554047	down4h
2313	-0.049035	7.34592	0.793813		-3.11349	7.34592	1.8948e-09	down4h
23131	0.165092	4.7446	0.546501		-1.08932	4.7446	0.00184776	down4h
23140	0.345241	7.49034	0.368028		-1.00495	7.49034	0.0194225	down4h
23149	0.0268463	6.5119	0.883145		-1.76845	6.5119	4.94492e-07	down4h
23155	-0.421563	0.786839	0.129337		-1.2474	0.786839	0.00294917	down4h
23171	-0.0876603	0.000403526	0.804662		-1.66027	0.000403526	0.0124673	down4h
23172	-0.104306	1.94005	0.711564		-1.50275	1.94005	0.00113194	down4h
23173	-0.228669	1.68307	0.311656		-1.34198	1.68307	0.000377395	down4h
23189	0.116806	-1.18009	0.838092		-1.88118	-1.18009	0.0142681	down4h
23196	0.131309	7.5773	0.658285		-1.04352	7.5773	0.00382519	down4h
23201	0.300638	2.98226	0.433889		-1.39337	2.98226	0.00704631	down4h
23214	0.0989693	10.8052	0.515871		-1.32293	10.8052	1.18183e-06	down4h
23216	0.0730647	7.3651	0.676865		-1.05384	7.3651	5.13067e-05	down4h
23220	0.117555	4.48672	0.550891		-1.6415	4.48672	3.42057e-06	down4h
23223	0.199642	7.34689	0.294366		-1.87209	7.34689	4.04104e-07	down4h
23225	0.0807478	3.57448	0.839358		-1.0632	3.57448	0.0240555	down4h
23228	0.0263504	5.72559	0.887375		-2.24264	5.72559	5.97903e-08	down4h
23252	0.146993	0.664089	0.6148		-3.07758	0.664089	3.17655e-05	down4h
23254	0.115614	4.13316	0.549453		-1.11402	4.13316	0.000110108	down4h
23262	0.114848	4.6127	0.775813		-1.08673	4.6127	0.0214514	down4h
23268	0.610458	3.65091	0.0487926		-2.51584	3.65091	6.71688e-06	down4h
23270	-0.225866	2.54157	0.41112		-1.27552	2.54157	0.00120906	down4h
23272	-0.0291204	3.83866	0.918325		-1.08984	3.83866	0.00305574	down4h
23276	-0.0315847	4.76378	0.867885		-1.90976	4.76378	6.18883e-07	down4h
23285	-0.251391	0.411361	0.418615		-2.86686	0.411361	7.4017e-05	down4h
23288	0.167693	5.50436	0.420574		-1.40231	5.50436	1.78692e-05	down4h
23299	0.259182	6.63041	0.251882		-3.24188	6.63041	8.77759e-09	down4h
2330	0.0181122	-0.106275	0.960211		-1.13736	-0.106275	0.0370701	down4h
23300	-0.142797	2.60003	0.603323		-1.37906	2.60003	0.00083164	down4h
23304	0.0976814	8.44213	0.725064		-1.77881	8.44213	3.28191e-05	down4h
23309	0.197744	5.66896	0.34218		-1.83535	5.66896	1.2414e-06	down4h
23310	0.294371	1.28225	0.294721		-2.47137	1.28225	6.90778e-05	down4h
23313	-0.126762	4.14625	0.509912		-1.07232	4.14625	0.000148523	down4h
23316	0.522126	-1.82423	0.553952		-2.90025	-1.82423	0.0396654	down4h
23317	0.0247768	4.70198	0.940957		-2.43721	4.70198	1.77121e-05	down4h
23326	0.053983	6.5477	0.825439		-1.27291	6.5477	0.000208397	down4h
23339	0.143103	6.23412	0.495135		-1.14135	6.23412	0.000125546	down4h
23347	0.154816	10.6253	0.672093		-1.26749	10.6253	0.0042717	down4h
23355	0.133146	6.77443	0.569873		-1.07347	6.77443	0.000544367	down4h
23360	0.0463383	4.33724	0.822361		-1.04552	4.33724	0.000339229	down4h
23370	0.116168	6.68236	0.566899		-1.93338	6.68236	5.67125e-07	down4h
23379	0.193277	3.57218	0.567011		-1.3512	3.57218	0.0029304	down4h
23381	0.191864	6.414	0.406673		-1.50375	6.414	2.49071e-05	down4h
23383	0.187036	6.61488	0.431387		-2.07112	6.61488	1.53615e-06	down4h
23386	-0.127983	2.80242	0.536472		-1.08841	2.80242	0.00048033	down4h
23396	0.125118	4.61546	0.600713		-1.21884	4.61546	0.000278013	down4h
23401	-0.318859	8.79725	0.0879568		-5.37441	8.79725	4.78923e-12	down4h
23405	0.167011	8.20297	0.663785		-1.06276	8.20297	0.0156415	down4h
23408	-0.0868769	0.837511	0.748825		-1.86741	0.837511	0.000356309	down4h
23410	-0.249396	1.41767	0.363212		-1.43395	1.41767	0.00135509	down4h
23417	-0.287429	0.9586	0.303688		-2.98625	0.9586	2.29348e-05	down4h
2342	0.100081	2.74789	0.671757		-1.41779	2.74789	0.000137871	down4h
23428	0.213249	-2.32148	0.818452		-5.05114	-2.32148	0.0445996	down4h
23438	-0.118558	4.62812	0.529987		-1.65198	4.62812	1.70476e-06	down4h
23456	-0.223905	0.640241	0.410245		-1.57054	0.640241	0.00122782	down4h
23462	-0.20186	1.77949	0.446826		-2.85292	1.77949	2.28069e-06	down4h
23469	0.257664	6.69086	0.346561		-2.07535	6.69086	6.02122e-06	down4h
23473	0.150526	3.7259	0.603152		-1.34724	3.7259	0.000801443	down4h
23483	-0.120417	-0.927685	0.830089		-2.71993	-0.927685	0.0118379	down4h
23484	-0.367549	4.27832	0.0997547		-2.26947	4.27832	3.18778e-07	down4h
23492	0.0491906	6.36919	0.800744		-2.69785	6.36919	1.37214e-08	down4h
23500	0.166771	4.01292	0.630392		-3.40635	4.01292	2.57593e-06	down4h
23506	0.0963781	6.33647	0.78437		-1.37626	6.33647	0.00201844	down4h
23508	-0.067023	5.62317	0.715574		-2.28989	5.62317	4.22852e-08	down4h
23510	-0.163388	4.69681	0.385375		-2.25114	4.69681	7.72827e-08	down4h
23523	0.124457	6.70518	0.488751		-2.21457	6.70518	3.74981e-08	down4h
23545	0.110744	3.071	0.658053		-1.09746	3.071	0.00134494	down4h
2355	0.122257	7.95701	0.699604		-1.54586	7.95701	0.000365944	down4h
23567	0.137129	2.65924	0.564571		-2.56797	2.65924	7.74667e-07	down4h
23583	-0.175389	1.86921	0.44879		-1.31135	1.86921	0.000321238	down4h
23588	-0.322818	3.52237	0.162938		-1.19444	3.52237	0.000244524	down4h
23589	-0.150413	3.83878	0.586439		-1.00075	3.83878	0.00459556	down4h
23598	-0.151137	2.30403	0.492496		-2.22885	2.30403	1.96451e-06	down4h
23600	-0.0901131	2.36417	0.702402		-4.12952	2.36417	4.90531e-08	down4h
23603	-0.00535964	7.08786	0.975155		-1.99287	7.08786	7.33745e-08	down4h
23609	-0.274571	3.22087	0.174902		-2.2869	3.22087	3.4868e-07	down4h
23659	0.123884	0.637271	0.744035		-1.64638	0.637271	0.0106741	down4h
23729	0.312765	0.11982	0.358291		-2.88458	0.11982	0.000183644	down4h
23759	0.0847279	3.61133	0.675996		-1.44364	3.61133	2.15562e-05	down4h
23761	-0.013946	8.1145	0.930926		-1.36594	8.1145	1.69909e-06	down4h
24149	0.324904	3.04677	0.386517		-1.04067	3.04677	0.0237633	down4h
245812	-0.0655175	0.129249	0.8492		-4.80041	0.129249	3.14239e-05	down4h
246175	-0.110663	5.63036	0.700097		-1.11805	5.63036	0.0020398	down4h
252839	-0.283271	0.743039	0.302476		-1.48191	0.743039	0.0024259	down4h
2529	-0.0545767	5.35514	0.791943		-2.62874	5.35514	4.64756e-08	down4h
253018	-0.39631	5.7002	0.0747181		-3.98523	5.7002	9.18344e-10	down4h
253143	0.194218	6.17672	0.609204		-2.26459	6.17672	8.04897e-05	down4h
253430	0.174418	5.62064	0.704312		-1.32038	5.62064	0.0157891	down4h
253461	0.0822119	3.84096	0.813733		-3.3734	3.84096	2.72098e-06	down4h
2535	-0.251475	-2.14732	0.793764		-5.86654	-2.14732	0.0124012	down4h
253512	0.0722692	0.394451	0.834545		-1.60584	0.394451	0.00301379	down4h
253832	0.0779655	3.33786	0.879787		-1.3519	3.33786	0.0317636	down4h
2542	-0.21211	-0.0899726	0.511474		-1.82525	-0.0899726	0.00262994	down4h
254225	0.0417582	6.38516	0.866888		-3.13466	6.38516	5.5975e-08	down4h
254394	-0.0737178	1.78394	0.814373		-1.42056	1.78394	0.0024621	down4h
254531	-0.0927463	3.42586	0.676943		-1.69669	3.42586	1.4454e-05	down4h
2549	0.228148	4.88813	0.445575		-2.66632	4.88813	2.24019e-06	down4h
255031	-0.0428552	2.97451	0.845004		-1.71558	2.97451	1.51194e-05	down4h
255043	0.0158313	2.74677	0.944215		-1.55989	2.74677	4.27129e-05	down4h
255374	-0.505612	-2.00098	0.518174		-5.05715	-2.00098	0.0435047	down4h
255394	0.269365	6.00732	0.482198		-1.2512	6.00732	0.00656077	down4h
255520	-0.143958	2.94048	0.473712		-1.49968	2.94048	1.69221e-05	down4h
256302	-0.0450513	6.85968	0.806279		-4.35795	6.85968	6.53821e-11	down4h
256471	-0.283429	2.35484	0.242302		-2.14151	2.35484	3.80495e-06	down4h
256987	0.153429	4.67455	0.67216		-1.31558	4.67455	0.00395373	down4h
257019	0.0336105	0.0669896	0.930361		-1.5408	0.0669896	0.00508262	down4h
25776	-0.305809	-0.746488	0.491241		-2.32902	-0.746488	0.00498193	down4h
25778	0.015602	4.19477	0.956289		-2.55844	4.19477	3.4028e-06	down4h
25786	0.278658	2.03839	0.241994		-1.61152	2.03839	0.000244738	down4h
25796	-0.228058	4.9071	0.48692		-1.29089	4.9071	0.00207931	down4h
25799	0.00620862	2.80386	0.975494		-1.08377	2.80386	0.000448505	down4h
25807	0.0274665	-0.228521	0.940762		-2.12782	-0.228521	0.00501109	down4h
25839	0.115478	3.20968	0.54978		-1.1303	3.20968	0.000139131	down4h
2584	0.132778	3.04143	0.541257		-2.45541	3.04143	6.05773e-07	down4h
25847	-0.401666	4.62746	0.0762146		-2.27074	4.62746	2.91362e-07	down4h
25853	0.0356341	5.3044	0.869177		-2.00903	5.3044	8.85581e-07	down4h
25880	-0.319622	-0.324896	0.389444		-3.31035	-0.324896	0.000317636	down4h
25900	0.10207	4.37244	0.597069		-3.17839	4.37244	4.10531e-09	down4h
25909	0.184257	7.93897	0.558412		-2.08493	7.93897	2.55494e-05	down4h
2591	-0.14551	4.3639	0.624853		-2.78828	4.3639	2.19564e-06	down4h
25914	0.833	-0.881339	0.144279		-2.68326	-0.881339	0.0125042	down4h
25920	0.0602718	3.50778	0.757651		-1.64475	3.50778	5.07262e-06	down4h
25923	-0.220193	2.17507	0.319564		-1.9697	2.17507	1.46522e-05	down4h
25930	0.160356	4.32701	0.55456		-2.02936	4.32701	1.15342e-05	down4h
25936	-0.234933	3.42728	0.238961		-1.14752	3.42728	0.000134183	down4h
25938	0.161774	4.28985	0.580393		-1.6907	4.28985	0.00011796	down4h
2595	0.395424	1.89595	0.229769		-1.19008	1.89595	0.00764197	down4h
25962	0.0823352	4.75081	0.723021		-1.06609	4.75081	0.000623715	down4h
25970	0.12047	3.78749	0.589097		-1.66227	3.78749	1.2254e-05	down4h
25973	-0.875078	-1.9061	0.330657		-2.81994	-1.9061	0.0347063	down4h
25988	-0.0025692	1.6564	0.990867		-1.07415	1.6564	0.00179802	down4h
25992	-0.128029	0.0964922	0.762608		-2.28677	0.0964922	0.000996863	down4h
26009	-0.241325	0.71922	0.532074		-1.77071	0.71922	0.00387789	down4h
260294	0.168863	0.884996	0.624093		-1.36099	0.884996	0.00572057	down4h
26030	0.295733	8.17068	0.182255		-2.75681	8.17068	2.80235e-08	down4h
26034	0.200829	5.53747	0.423709		-2.83038	5.53747	1.84421e-07	down4h
26054	-0.105891	6.52942	0.648658		-1.46518	6.52942	3.60977e-05	down4h
26058	0.226432	5.38828	0.360315		-1.50103	5.38828	5.1429e-05	down4h
26060	-0.0350261	1.99479	0.891006		-1.02395	1.99479	0.00468002	down4h
26071	-0.482089	0.963209	0.118847		-1.12727	0.963209	0.0201545	down4h
26092	-0.107758	6.26254	0.601206		-1.35644	6.26254	2.34656e-05	down4h
26098	0.154379	3.06929	0.473241		-2.03584	3.06929	1.55472e-06	down4h
26100	0.0737513	6.31181	0.719468		-1.53188	6.31181	7.21787e-06	down4h
26128	-0.0325145	0.940833	0.894299		-1.2482	0.940833	0.00519049	down4h
26130	0.219648	5.87888	0.404356		-1.4735	5.87888	0.000104486	down4h
26145	0.0483871	2.45558	0.839483		-1.35478	2.45558	0.000235088	down4h
26146	0.491997	-0.77104	0.29725		-2.03239	-0.77104	0.0477813	down4h
26149	-0.197894	-0.297561	0.584784		-2.66543	-0.297561	0.0219446	down4h
26151	0.13513	1.54113	0.595214		-1.82588	1.54113	0.00010638	down4h
26157	-0.305254	3.43347	0.1712		-2.47071	3.43347	1.43998e-07	down4h
26173	0.365423	5.51992	0.158684		-1.16727	5.51992	0.000529028	down4h
26190	0.0171663	5.64824	0.93467		-1.13851	5.64824	0.000148724	down4h
26224	-0.124626	5.68739	0.626516		-1.70612	5.68739	2.47984e-05	down4h
26229	-0.266264	2.35184	0.414003		-1.18132	2.35184	0.00713157	down4h
26230	0.16221	3.34257	0.479049		-2.15641	3.34257	1.40952e-06	down4h
26234	-0.108441	8.73053	0.550213		-1.73415	8.73053	4.99288e-07	down4h
26235	-0.000773292	2.41546	0.996955		-2.90266	2.41546	8.63231e-08	down4h
26268	-0.178714	4.16033	0.373685		-1.45522	4.16033	1.18788e-05	down4h
26273	-0.32138	2.80085	0.139595		-1.25508	2.80085	0.000126134	down4h
26276	0.367613	1.63216	0.123026		-1.71051	1.63216	6.69048e-05	down4h
2629	-0.0107634	5.41105	0.956703		-1.33819	5.41105	2.14811e-05	down4h
26292	-0.363053	4.04697	0.173816		-1.04493	4.04697	0.00193988	down4h
2630	-0.227406	3.19065	0.458705		-1.00624	3.19065	0.00977154	down4h
2650	-0.0688113	1.50112	0.810782		-1.01933	1.50112	0.0171115	down4h
26505	0.0777377	4.83456	0.688311		-1.20625	4.83456	4.28627e-05	down4h
26515	0.149666	2.12684	0.554956		-1.10261	2.12684	0.00399122	down4h
26523	0.263982	6.16304	0.337992		-1.34072	6.16304	0.000317854	down4h
26586	0.0258757	1.32344	0.916145		-2.26794	1.32344	1.70355e-05	down4h
266655	0.0373702	0.176055	0.918952		-1.41745	0.176055	0.0158431	down4h
267	-0.1101	3.6807	0.647724		-1.02961	3.6807	0.00148161	down4h
267002	-0.14251	1.20804	0.567623		-2.61534	1.20804	1.65345e-05	down4h
267004	-0.0741157	0.658378	0.840481		-2.14431	0.658378	0.00129297	down4h
2677	-0.0852959	2.71201	0.688678		-1.60499	2.71201	2.14055e-05	down4h
26815	-0.0719149	-1.0638	0.881979		-1.78858	-1.0638	0.0317698	down4h
26953	0.0275362	2.11331	0.920954		-2.26979	2.11331	4.09572e-05	down4h
26985	-0.130679	3.67469	0.507376		-1.66161	3.67469	3.23489e-06	down4h
27005	-0.0122429	2.6866	0.960524		-1.69196	2.6866	6.07661e-05	down4h
27013	-0.158029	5.41123	0.39923		-1.59601	5.41123	1.82037e-06	down4h
27031	0.121247	3.15812	0.673759		-1.63395	3.15812	0.000211563	down4h
27034	-0.0186882	2.45038	0.934314		-1.96322	2.45038	9.06049e-06	down4h
27075	-0.446532	2.86094	0.0561706		-1.17665	2.86094	0.000284071	down4h
27097	0.184791	2.00493	0.544609		-1.22882	2.00493	0.00951637	down4h
27101	-0.389247	2.5226	0.103675		-1.85579	2.5226	1.41226e-05	down4h
27102	-0.140837	4.18211	0.494547		-1.41378	4.18211	2.37898e-05	down4h
27111	-0.101442	1.0042	0.778447		-1.11909	1.0042	0.00999284	down4h
27141	-0.0527855	5.1507	0.781004		-2.93093	5.1507	6.66547e-09	down4h
27143	-0.149087	-1.06025	0.835591		-1.68381	-1.06025	0.0275354	down4h
27163	-0.275766	4.25748	0.202456		-1.535	4.25748	1.07247e-05	down4h
27202	0.0265756	6.52754	0.894479		-4.18662	6.52754	3.04536e-10	down4h
27232	0.25161	1.06788	0.407722		-2.07769	1.06788	0.000186434	down4h
27284	0.11443	4.90975	0.720844		-2.24176	4.90975	2.1864e-05	down4h
27297	0.173225	3.97351	0.386243		-2.04398	3.97351	4.87984e-07	down4h
2730	-0.201843	1.90792	0.381843		-1.51313	1.90792	0.000127617	down4h
27304	-0.221946	0.442001	0.478749		-1.35648	0.442001	0.00404899	down4h
27327	0.0780813	3.20786	0.712752		-1.17303	3.20786	0.000231198	down4h
2733	-0.018161	4.75524	0.922843		-1.1136	4.75524	6.86075e-05	down4h
27333	-0.173263	-0.126055	0.655902		-1.31799	-0.126055	0.033726	down4h
2735	-0.13037	-0.55203	0.769332		-2.8846	-0.55203	0.00415275	down4h
2738	0.0145816	1.25682	0.956068		-1.16916	1.25682	0.00549566	down4h
27439	-0.0347935	4.759	0.868116		-1.17757	4.759	0.00013009	down4h
27440	-0.0552133	0.137748	0.867658		-1.27119	0.137748	0.0369774	down4h
2776	0.120677	6.37653	0.766374		-1.45833	6.37653	0.00383394	down4h
279	-0.738228	0.0620015	0.066923		-1.86558	0.0620015	0.00471547	down4h
2800	0.0600829	4.03228	0.782597		-1.40796	4.03228	4.44823e-05	down4h
2829	0.158391	-0.917735	0.807632		-2.46304	-0.917735	0.0173596	down4h
283130	-0.203272	2	0.355977		-1.40076	2	0.000223561	down4h
283209	0.341565	0.884003	0.225896		-1.14373	0.884003	0.00302363	down4h
283219	0.130351	4.10038	0.50906		-2.69355	4.10038	2.98259e-08	down4h
283237	-0.114594	1.62221	0.64313		-2.32083	1.62221	5.38641e-06	down4h
283254	0.103009	-0.146964	0.752222		-1.78972	-0.146964	0.00183416	down4h
283337	-0.0822191	3.63898	0.674406		-2.13072	3.63898	2.58359e-07	down4h
283349	0.330715	7.68202	0.380279		-1.91706	7.68202	0.000247293	down4h
283373	0.320406	3.55993	0.346185		-2.10477	3.55993	7.85211e-05	down4h
283464	-0.0169062	2.53979	0.951696		-2.26773	2.53979	1.8943e-05	down4h
283489	0.300076	1.30728	0.249526		-1.88101	1.30728	8.67725e-05	down4h
283521	0.14047	3.70901	0.569599		-1.82746	3.70901	1.86055e-05	down4h
283537	-0.529258	2.91637	0.0510208		-3.05921	2.91637	3.18977e-07	down4h
283578	0.529825	1.59618	0.274604		-2.9989	1.59618	0.00211501	down4h
283588	-0.0280693	1.68777	0.911976		-3.4545	1.68777	1.53157e-06	down4h
283777	-0.459386	-0.832512	0.349784		-3.47045	-0.832512	0.00440238	down4h
283849	-0.551397	0.664333	0.121566		-1.49142	0.664333	0.00223457	down4h
283870	-0.0868757	1.22411	0.749559		-1.41477	1.22411	0.00211557	down4h
283871	-0.031646	3.18254	0.871764		-2.35443	3.18254	2.67288e-07	down4h
283897	-0.0881712	8.26156	0.587663		-3.03337	8.26156	4.38638e-10	down4h
283899	0.0497293	3.27883	0.804821		-1.18611	3.27883	0.000155794	down4h
283922	0.129814	2.32206	0.750728		-1.59848	2.32206	0.00521754	down4h
284	0.13336	3.74037	0.551688		-1.16069	3.74037	0.000345277	down4h
284004	-0.180873	2.94337	0.387568		-1.12282	2.94337	0.000325905	down4h
284058	0.177207	6.4611	0.541131		-2.10804	6.4611	1.10558e-05	down4h
2842	-0.459975	0.368459	0.275772		-2.68719	0.368459	0.000226328	down4h
284273	-0.248849	2.04362	0.285305		-1.90637	2.04362	1.39144e-05	down4h
284276	-0.530401	-1.78522	0.484231		-5.67922	-1.78522	0.0196566	down4h
284309	-0.148255	4.93942	0.545486		-1.53109	4.93942	4.8454e-05	down4h
284323	-0.185634	2.14348	0.418423		-1.56398	2.14348	5.04327e-05	down4h
284325	-0.180809	1.37806	0.458544		-1.24422	1.37806	0.00166893	down4h
284390	-0.170066	2.3296	0.452944		-2.59001	2.3296	3.29383e-07	down4h
284391	-0.0387057	2.5727	0.868892		-1.59865	2.5727	4.38737e-05	down4h
284611	-0.207237	2.04423	0.414268		-2.70289	2.04423	3.49563e-06	down4h
284613	-0.142526	4.57532	0.460151		-2.9773	4.57532	5.63179e-09	down4h
284615	-0.401251	-2.08533	0.686507		-5.45984	-2.08533	0.0471736	down4h
284677	0.0196597	0.621191	0.94798		-1.73617	0.621191	0.00207161	down4h
284697	-0.185012	-1.9398	0.832862		-5.67227	-1.9398	0.0283274	down4h
284756	0.00725795	1.39668	0.976122		-1.97281	1.39668	0.00030466	down4h
284759	-0.0138377	7.31314	0.945534		-2.86471	7.31314	1.12468e-08	down4h
2850	0.0410777	4.81845	0.866238		-2.33495	4.81845	1.57323e-06	down4h
285051	0.343389	-0.935485	0.550901		-3.6533	-0.935485	0.00562952	down4h
285074	0.0638347	5.2516	0.734372		-1.48906	5.2516	4.32845e-06	down4h
285193	-0.145525	0.10407	0.700416		-1.96226	0.10407	0.00374371	down4h
285267	-0.243954	0.778311	0.436758		-2.32821	0.778311	0.000246166	down4h
285346	0.477086	1.08263	0.265567		-2.50953	1.08263	0.00198538	down4h
285362	-0.155801	1.96584	0.473972		-1.04953	1.96584	0.00113072	down4h
285429	0.15187	0.996439	0.661113		-3.15653	0.996439	3.39495e-05	down4h
285513	0.433997	1.1853	0.367141		-1.31833	1.1853	0.0293947	down4h
285613	-0.0304992	2.27908	0.888232		-2.35837	2.27908	1.19302e-06	down4h
285908	0.218122	2.44887	0.319366		-1.30657	2.44887	0.000180796	down4h
285943	-0.157988	0.336917	0.660194		-2.20076	0.336917	0.00143359	down4h
285965	0.297556	0.88174	0.30329		-1.17134	0.88174	0.00846097	down4h
285966	-0.129182	2.1848	0.664969		-1.40212	2.1848	0.00183287	down4h
286006	0.165242	3.84743	0.439088		-1.00682	3.84743	0.000534398	down4h
286075	0.238076	1.64471	0.310189		-1.78925	1.64471	6.15968e-05	down4h
286101	0.135156	2.00111	0.529668		-1.52225	2.00111	0.000204169	down4h
286336	-0.154892	5.06224	0.444988		-4.08194	5.06224	3.63603e-10	down4h
286530	0.0480339	5.98313	0.79518		-1.25927	5.98313	1.70338e-05	down4h
2887	0.24702	3.933	0.254854		-1.35169	3.933	5.73621e-05	down4h
28964	-0.13574	3.92449	0.498734		-1.25146	3.92449	6.34678e-05	down4h
28968	0.366543	1.00888	0.302667		-1.00476	1.00888	0.043096	down4h
28970	-0.0689651	4.37595	0.742073		-1.18714	4.37595	0.000106801	down4h
28990	-0.053043	0.617328	0.848632		-1.69197	0.617328	0.00195706	down4h
29071	-0.505138	3.2614	0.0295303		-1.3095	3.2614	6.73847e-05	down4h
29072	0.261701	6.80306	0.403035		-1.78808	6.80306	8.93307e-05	down4h
2908	0.0748069	7.2897	0.748376		-1.53899	7.2897	2.35804e-05	down4h
29083	-0.93803	-1.02757	0.0669712		-1.77997	-1.02757	0.0286902	down4h
29087	-0.325178	1.40638	0.296239		-1.81352	1.40638	0.000509943	down4h
2909	0.160715	3.33343	0.545437		-1.45979	3.33343	0.000228485	down4h
29092	-0.306868	0.551597	0.263091		-3.57892	0.551597	9.64562e-06	down4h
29099	-0.0854231	1.68312	0.709581		-1.57816	1.68312	0.000104468	down4h
29108	-0.245152	6.30399	0.48121		-1.7628	6.30399	0.000281744	down4h
29125	0.00943795	4.61926	0.960362		-2.2946	4.61926	8.09576e-08	down4h
29128	0.282153	0.0971894	0.413794		-2.63197	0.0971894	0.000103808	down4h
2936	0.0714693	5.33393	0.708154		-2.28051	5.33393	6.95413e-08	down4h
2956	-0.176264	2.90545	0.436125		-2.4941	2.90545	4.6249e-07	down4h
2957	0.0917577	3.35264	0.79588		-1.51731	3.35264	0.00140888	down4h
2966	-0.158434	3.97868	0.603948		-3.75331	3.97868	2.54501e-07	down4h
2975	0.26713	4.63272	0.355244		-1.00865	4.63272	0.00434729	down4h
2976	-0.0781309	3.58007	0.705864		-1.67331	3.58007	6.08654e-06	down4h
29761	0.0717477	5.71041	0.779099		-1.35292	5.71041	0.000193914	down4h
29767	-0.0506587	4.37502	0.863089		-1.33684	4.37502	0.000662944	down4h
29855	0.0693156	8.62797	0.673744		-2.08175	8.62797	2.54526e-08	down4h
29883	-0.233606	4.30428	0.26219		-1.28676	4.30428	4.87151e-05	down4h
29888	0.0813103	7.07147	0.642331		-1.50014	7.07147	1.5435e-06	down4h
29893	0.0481718	0.721288	0.857956		-2.53467	0.721288	5.89653e-05	down4h
29899	0.042793	2.70048	0.881052		-3.06367	2.70048	2.15793e-06	down4h
29902	0.0929566	0.19968	0.769886		-3.27956	0.19968	2.00893e-05	down4h
29919	0.000828705	4.33639	0.996794		-1.33289	4.33639	3.90679e-05	down4h
29934	0.111357	1.27217	0.625749		-1.48754	1.27217	0.000360352	down4h
29959	-0.139908	6.37585	0.504746		-1.03635	6.37585	0.000295416	down4h
29960	-0.488978	0.17605	0.160732		-1.03574	0.17605	0.0232856	down4h
29993	-0.0103679	-0.299091	0.983572		-2.12629	-0.299091	0.00388374	down4h
29998	0.265832	4.939	0.282122		-1.19482	4.939	0.000357218	down4h
3000	1.15587	-2.24675	0.253563		-5.56857	-2.24675	0.0207186	down4h
30001	-0.147263	5.74362	0.497869		-1.28743	5.74362	6.40497e-05	down4h
30008	0.063808	1.12828	0.842103		-1.13014	1.12828	0.0194281	down4h
30061	-0.229913	6.72484	0.20886		-3.65065	6.72484	2.24908e-10	down4h
3017	-0.157276	2.57097	0.529039		-1.76974	2.57097	3.41492e-05	down4h
3029	-0.114696	3.02051	0.672263		-1.17712	3.02051	0.00158566	down4h
3034	0.0731201	7.38859	0.71647		-1.60967	7.38859	3.4694e-06	down4h
3052	0.076494	1.68703	0.744668		-1.23306	1.68703	0.000881253	down4h
3071	0.205374	6.31874	0.375132		-1.50667	6.31874	2.45464e-05	down4h
3077	0.395566	-1.23346	0.446776		-5.95063	-1.23346	0.00578698	down4h
3082	0.0884057	0.608531	0.824766		-3.16746	0.608531	0.000153907	down4h
30827	-0.0238386	3.70574	0.903816		-1.07171	3.70574	0.000218336	down4h
30833	-0.0908734	2.18815	0.750437		-1.16897	2.18815	0.00365646	down4h
30837	0.217523	-0.08526	0.666259		-1.80785	-0.08526	0.0362615	down4h
30845	0.0267965	0.486922	0.930422		-1.72967	0.486922	0.000758613	down4h
3087	-0.484338	4.67442	0.0264159		-2.73819	4.67442	1.86513e-08	down4h
3098	-0.0142915	4.95326	0.941673		-1.39719	4.95326	1.35439e-05	down4h
314	0.11312	4.93482	0.610717		-1.60604	4.93482	1.17061e-05	down4h
3142	-0.395017	5.93581	0.0582984		-2.87412	5.93581	9.0953e-09	down4h
3162	-0.221061	5.14761	0.256786		-3.39634	5.14761	1.38247e-09	down4h
3163	-0.189243	4.49822	0.395463		-3.22758	4.49822	3.91469e-08	down4h
317	0.0915395	7.44805	0.772903		-1.39743	7.44805	0.000815987	down4h
318	-0.554454	0.213251	0.111212		-1.54454	0.213251	0.00334095	down4h
3185	-0.0614793	6.30083	0.740011		-1.36073	6.30083	8.50214e-06	down4h
3198	-0.693049	0.429325	0.0797058		-2.29402	0.429325	0.00382211	down4h
3205	-0.290677	-0.127653	0.442297		-3.22052	-0.127653	0.000914452	down4h
324	0.238322	6.82675	0.617707		-1.27967	6.82675	0.0192244	down4h
326624	-0.107775	6.98106	0.560893		-2.93987	6.98106	2.86531e-09	down4h
327	0.0777376	3.5777	0.690755		-1.51054	3.5777	1.15413e-05	down4h
3274	0.185173	6.33176	0.33219		-3.26614	6.33176	1.34467e-09	down4h
3292	0.284265	-1.41433	0.63024		-6.10693	-1.41433	0.0056887	down4h
3300	0.104417	3.85531	0.648042		-1.31886	3.85531	0.000148175	down4h
3310	-0.173015	8.41539	0.288826		-1.90297	8.41539	4.71956e-08	down4h
3311	-0.125248	6.23517	0.517296		-1.63814	6.23517	1.89673e-06	down4h
3344	-0.0528953	3.78425	0.89977		-2.73475	3.78425	6.9546e-05	down4h
3373	0.221915	-0.452123	0.565812		-1.45048	-0.452123	0.034106	down4h
337873	0.0460668	1.71072	0.878364		-2.25397	1.71072	7.66226e-05	down4h
338692	0.0975536	7.61439	0.64426		-1.16193	7.61439	0.0001151	down4h
338799	-0.107373	1.95394	0.632176		-1.57837	1.95394	5.19494e-05	down4h
339122	0.0819118	6.95385	0.663339		-1.05855	6.95385	9.66253e-05	down4h
339201	-0.404781	2.2167	0.072443		-1.74716	2.2167	1.48205e-05	down4h
339263	0.317231	-1.35932	0.642322		-1.97846	-1.35932	0.0359757	down4h
339448	-0.211249	1.95692	0.441395		-2.94739	1.95692	2.78243e-06	down4h
339451	0.0340213	0.479682	0.920158		-1.04384	0.479682	0.0429447	down4h
339488	0.566868	-1.73192	0.417369		-5.0489	-1.73192	0.0484635	down4h
339500	0.433776	-1.27409	0.454717		-2.1082	-1.27409	0.0420378	down4h
339745	0.0779051	6.8397	0.763758		-1.03526	6.8397	0.001607	down4h
339855	0.286076	0.153682	0.494548		-1.99571	0.153682	0.0160195	down4h
340120	-0.187358	1.55166	0.414361		-2.30594	1.55166	6.91943e-06	down4h
340527	0.452328	6.93847	0.302584		-3.4407	6.93847	7.88543e-06	down4h
341112	0.0622573	-1.85611	0.942714		-6.11102	-1.85611	0.0124608	down4h
3416	0.0303158	0.416623	0.921833		-1.26455	0.416623	0.0147754	down4h
3417	-0.0745968	3.15425	0.73006		-2.61194	3.15425	1.92011e-07	down4h
342510	-0.710648	-0.0671521	0.132138		-1.69133	-0.0671521	0.0152212	down4h
342909	0.437071	-0.834859	0.379776		-1.92397	-0.834859	0.0151278	down4h
342931	3.55617	-2.64384	0.102017		-5.45381	-2.64384	0.0452863	down4h
343413	-0.238079	-0.107505	0.578639		-3.88997	-0.107505	0.00259055	down4h
343990	-0.0731637	1.96314	0.787662		-1.34417	1.96314	0.00133037	down4h
344405	0.0908153	0.0343098	0.803032		-2.69808	0.0343098	9.79519e-05	down4h
344887	-0.608597	-1.02769	0.296304		-1.3401	-1.02769	0.0310734	down4h
345275	-0.266154	0.347609	0.509674		-1.96007	0.347609	0.00585592	down4h
3455	-0.0457076	6.65867	0.793268		-2.90809	6.65867	1.77693e-09	down4h
345757	-0.177932	4.31451	0.421025		-2.0586	4.31451	1.49965e-06	down4h
346007	0.00925693	0.39818	0.979597		-1.90534	0.39818	0.00299602	down4h
347454	-0.448753	3.33698	0.0529249		-5.10654	3.33698	3.29686e-10	down4h
3480	0.266512	7.99859	0.432964		-1.46481	7.99859	0.000885406	down4h
348110	-0.13087	0.543023	0.665683		-3.86714	0.543023	9.06804e-06	down4h
3482	0.307992	11.6161	0.416961		-1.85451	11.6161	0.000339788	down4h
348793	-0.218064	1.42456	0.399139		-1.80874	1.42456	0.000163402	down4h
35	-0.640491	-0.039303	0.0661071		-1.40845	-0.039303	0.00694261	down4h
3516	-0.026512	6.50303	0.882397		-1.47047	6.50303	2.69958e-06	down4h
353274	0.239161	3.98358	0.332127		-2.10542	3.98358	3.55754e-06	down4h
3568	0.229807	-1.37817	0.677819		-5.19608	-1.37817	0.028326	down4h
3570	0.0548302	9.2437	0.757722		-2.35481	9.2437	1.68459e-08	down4h
3577	-0.215776	10.3194	0.227117		-2.48499	10.3194	7.1717e-09	down4h
3579	-0.165993	11.3278	0.269486		-2.34616	11.3278	1.85069e-09	down4h
3580	-0.555328	1.47849	0.0424848		-2.77228	1.47849	3.11335e-06	down4h
3581	-0.0437231	1.22448	0.902258		-1.51693	1.22448	0.00429287	down4h
3590	0.214746	0.352712	0.526596		-1.87679	0.352712	0.00279308	down4h
3607	0.170433	3.37647	0.429115		-1.52813	3.37647	2.8754e-05	down4h
3613	-0.198671	6.18446	0.36542		-2.46495	6.18446	1.25349e-07	down4h
3619	0.153487	2.36294	0.573928		-1.5052	2.36294	0.000453842	down4h
3621	-0.200135	4.32426	0.349563		-2.80501	4.32426	4.4235e-08	down4h
3631	0.224521	5.97747	0.486039		-1.44429	5.97747	0.000695093	down4h
3635	0.214121	8.32823	0.330034		-2.06163	8.32823	5.95528e-07	down4h
3655	-0.189496	1.05864	0.592939		-1.56065	1.05864	0.0110473	down4h
3661	-0.126537	4.35518	0.602146		-1.03125	4.35518	0.00117623	down4h
3672	0.128172	1.72494	0.627301		-1.26201	1.72494	0.00218941	down4h
3676	-0.069995	4.74575	0.835475		-2.0243	4.74575	7.83636e-05	down4h
3678	0.0885798	8.3715	0.614856		-2.04813	8.3715	6.31777e-08	down4h
368	0.454226	1.29715	0.0922365		-1.33784	1.29715	0.000862627	down4h
3682	-0.0356046	1.34441	0.914166		-1.10893	1.34441	0.009748	down4h
3691	0.343109	3.49565	0.107939		-1.81674	3.49565	2.51146e-06	down4h
3705	0.0428186	8.60449	0.789679		-1.35318	8.60449	1.80424e-06	down4h
3707	0.156585	6.55768	0.458375		-1.63862	6.55768	4.4562e-06	down4h
3720	0.167236	7.54005	0.404787		-1.4464	7.54005	8.38436e-06	down4h
373	-0.0647682	3.4525	0.755186		-2.32229	3.4525	2.22127e-07	down4h
374395	-0.306458	3.59675	0.190576		-1.06977	3.59675	0.000665957	down4h
374403	-0.0185724	6.89054	0.93944		-1.23941	6.89054	0.000255472	down4h
374500	0.0556233	-0.915551	0.901903		-1.72361	-0.915551	0.018481	down4h
374819	0.227751	2.01165	0.456882		-1.90159	2.01165	0.000440157	down4h
374872	-0.0161374	5.30572	0.93165		-2.45263	5.30572	2.90669e-08	down4h
374879	-0.168003	0.650488	0.579407		-1.50583	0.650488	0.00662965	down4h
374986	-0.166417	1.0516	0.65114		-1.08134	1.0516	0.0277677	down4h
375316	0.242768	0.682932	0.377953		-1.73756	0.682932	0.00201823	down4h
375387	0.00134854	1.71104	0.99738		-1.71256	1.71104	2.90834e-05	down4h
375690	0.6178	2.9316	0.049764		-1.59068	2.9316	0.000271884	down4h
375743	0.0914653	5.80116	0.815697		-1.25425	5.80116	0.0075146	down4h
378805	0.111891	4.17638	0.664712		-1.13766	4.17638	0.00104798	down4h
3796	-0.0154935	3.20299	0.94473		-1.57491	3.20299	3.02634e-05	down4h
3815	0.0562036	2.342	0.856179		-1.12371	2.342	0.00608083	down4h
3839	-0.0529449	2.74447	0.798342		-1.04793	2.74447	0.000632651	down4h
3842	0.0874288	5.46756	0.739847		-1.85126	5.46756	1.53155e-05	down4h
387032	0.0487204	1.87137	0.838252		-2.59228	1.87137	1.44085e-06	down4h
387119	0.212104	4.20404	0.341861		-1.61517	4.20404	1.79272e-05	down4h
387263	-0.0944633	2.85004	0.650128		-1.27932	2.85004	0.000115572	down4h
387328	-0.224057	1.81331	0.387773		-2.05297	1.81331	1.55545e-05	down4h
387496	-0.0368648	-0.22971	0.917988		-2.53575	-0.22971	0.00192156	down4h
387751	0.275114	4.67782	0.575238		-1.89139	4.67782	0.00263985	down4h
387755	0.606559	0.0949243	0.107494		-2.47938	0.0949243	0.00169241	down4h
387787	-0.741666	-2.15012	0.439913		-5.56858	-2.15012	0.0239833	down4h
387837	-0.139106	3.54682	0.530144		-1.79025	3.54682	7.23088e-06	down4h
387921	-0.254834	0.28036	0.387572		-1.34404	0.28036	0.00415153	down4h
388	-0.332004	7.61738	0.0736914		-4.13653	7.61738	4.8111e-11	down4h
388284	-0.276053	-0.065406	0.587723		-2.84265	-0.065406	0.00324311	down4h
388341	-0.00288787	3.31106	0.989341		-2.48598	3.31106	1.58683e-07	down4h
388387	-0.330662	1.72007	0.155661		-1.5871	1.72007	0.000260348	down4h
388403	-0.018228	4.01318	0.929778		-3.31696	4.01318	7.77804e-09	down4h
388552	-0.0472654	3.64987	0.808396		-2.66414	3.64987	3.80568e-08	down4h
388558	0.265856	2.79469	0.516542		-1.73985	2.79469	0.00223123	down4h
388559	0.122028	0.949462	0.654097		-1.32508	0.949462	0.00186438	down4h
388569	0.411371	-0.709651	0.291514		-1.83854	-0.709651	0.0167887	down4h
388730	-0.144532	1.07147	0.589258		-1.34351	1.07147	0.00133733	down4h
388969	-0.0885353	5.26172	0.660354		-2.72617	5.26172	2.27315e-08	down4h
389161	0.432237	0.815242	0.270321		-5.85574	0.815242	9.87909e-06	down4h
389541	-0.233606	6.58844	0.561052		-1.49239	6.58844	0.00287978	down4h
389607	0.936275	2.91867	0.138947		-2.61475	2.91867	0.00311889	down4h
389677	0.21338	2.80208	0.603867		-2.74237	2.80208	9.84961e-05	down4h
389792	-0.978783	2.22982	0.00490572		-5.96283	2.22982	6.14643e-08	down4h
390036	0.322454	0.195865	0.3878		-1.94303	0.195865	0.0027706	down4h
390980	0.0176268	1.66659	0.952579		-1.4157	1.66659	0.00453267	down4h
392	-0.0832475	6.14213	0.645458		-1.85714	6.14213	2.90434e-07	down4h
392490	0.316636	4.19489	0.30859		-2.98364	4.19489	1.73385e-06	down4h
3930	-0.104067	8.09698	0.577288		-3.08817	8.09698	1.81859e-09	down4h
3931	-0.0723642	1.50765	0.783857		-1.10002	1.50765	0.00263365	down4h
3952	0.0650212	0.231096	0.886212		-3.99226	0.231096	8.49098e-05	down4h
3964	0.0135592	3.9087	0.956465		-1.44043	3.9087	0.00013176	down4h
3991	-0.0915603	0.0609191	0.784333		-1.51651	0.0609191	0.00312542	down4h
3996	0.355281	1.00554	0.320214		-1.12653	1.00554	0.0297676	down4h
399669	-0.334869	0.710491	0.240186		-1.65534	0.710491	0.000830373	down4h
399687	0.474083	5.0558	0.124946		-2.23118	5.0558	1.00836e-05	down4h
399753	0.191162	3.19619	0.405456		-2.18742	3.19619	1.48839e-06	down4h
399940	0.406544	-2.21384	0.655494		-5.33293	-2.21384	0.030706	down4h
400073	-0.189203	0.0753343	0.587047		-1.23168	0.0753343	0.0236732	down4h
400236	0.32743	-1.19959	0.529752		-2.65502	-1.19959	0.0318727	down4h
400242	0.0252569	0.744896	0.935469		-1.97808	0.744896	0.000156785	down4h
4005	-0.113781	5.43462	0.568413		-2.39961	5.43462	6.0689e-08	down4h
400539	0.604092	1.41768	0.0602472		-2.23746	1.41768	0.000112408	down4h
400566	-0.109951	0.278417	0.738142		-2.34868	0.278417	0.000566469	down4h
400569	-0.264384	3.90827	0.371282		-1.16982	3.90827	0.00219504	down4h
400657	-0.288958	2.4019	0.194699		-1.40196	2.4019	9.26269e-05	down4h
400660	0.694015	-0.507426	0.0714522		-2.59352	-0.507426	0.00321368	down4h
400673	0.251473	1.1537	0.444735		-1.52437	1.1537	0.00322615	down4h
4007	0.00496761	2.15127	0.981546		-1.39825	2.15127	0.000130973	down4h
400927	0.159397	1.73279	0.588369		-1.21002	1.73279	0.00274583	down4h
400931	-0.0679798	2.77581	0.78039		-2.36895	2.77581	2.86077e-06	down4h
401233	0.0217981	5.47877	0.91809		-1.35466	5.47877	3.52651e-05	down4h
401262	0.169309	-1.45534	0.751367		-4.70122	-1.45534	0.0471516	down4h
401264	-1.20221	-1.69138	0.0943453		-5.7734	-1.69138	0.00961414	down4h
401303	-0.38033	0.493087	0.208631		-2.73189	0.493087	0.000109704	down4h
401494	-0.158831	4.72547	0.422692		-1.78756	4.72547	1.36245e-06	down4h
401509	0.20946	0.107928	0.604416		-5.20596	0.107928	0.0444457	down4h
401563	-0.160438	3.95942	0.410573		-4.15385	3.95942	6.45458e-10	down4h
401577	-0.108584	2.23804	0.700553		-1.53325	2.23804	0.000619703	down4h
402682	0.30888	-1.73472	0.651015		-5.6702	-1.73472	0.0149437	down4h
403	-0.328144	2.95978	0.297003		-1.69578	2.95978	0.000409379	down4h
4033	0.0267473	7.88921	0.871276		-2.13627	7.88921	2.11302e-08	down4h
403341	0.124333	6.77783	0.596894		-3.07096	6.77783	2.9088e-08	down4h
4035	-0.0916777	2.77454	0.83117		-3.15243	2.77454	5.90458e-05	down4h
404093	0.270129	3.95856	0.208072		-1.06793	3.95856	0.000340644	down4h
404550	-0.144729	1.04677	0.654124		-1.74717	1.04677	0.000293466	down4h
404636	-0.19529	5.46255	0.334659		-3.4139	5.46255	2.21717e-09	down4h
4055	-0.003301	6.27478	0.98582		-1.45015	6.27478	4.39778e-06	down4h
406	0.00818486	5.70325	0.970962		-1.09476	5.70325	0.000373859	down4h
4066	-0.0997603	4.93088	0.654462		-3.59593	4.93088	4.66564e-09	down4h
407016	1.09943	-0.567645	0.0531314		-1.65629	-0.567645	0.0307277	down4h
4076	0.0393369	5.59616	0.861136		-1.38358	5.59616	4.90039e-05	down4h
4089	-0.0369249	5.22182	0.887587		-1.59584	5.22182	5.98613e-05	down4h
4090	-0.265149	0.393234	0.47397		-1.08308	0.393234	0.0392663	down4h
412	0.022046	3.02068	0.929917		-1.6723	3.02068	6.98337e-05	down4h
4122	0.141317	8.02826	0.536447		-2.07687	8.02826	9.5904e-07	down4h
4126	-0.0206244	6.21857	0.910094		-1.04111	6.21857	8.79396e-05	down4h
414152	0.0267648	4.7474	0.910504		-2.89953	4.7474	1.19805e-07	down4h
414189	-0.023071	3.33221	0.906648		-1.66497	3.33221	4.04024e-06	down4h
414318	0.597939	-0.403789	0.20246		-2.29325	-0.403789	0.00264852	down4h
4144	-0.106651	3.78572	0.59212		-1.24497	3.78572	6.09418e-05	down4h
414926	0.180799	1.54046	0.438288		-1.91409	1.54046	1.65963e-05	down4h
4150	0.0353289	5.86679	0.849664		-1.59389	5.86679	1.95209e-06	down4h
4155	0.0177661	8.85306	0.922418		-2.81955	8.85306	3.63559e-09	down4h
4174	0.027381	4.08055	0.890361		-1.13881	4.08055	0.000128457	down4h
4200	-0.0993485	5.24202	0.631229		-2.14953	5.24202	3.00712e-07	down4h
4208	0.0789179	4.66923	0.684847		-1.79493	4.66923	9.44963e-07	down4h
4214	0.116518	6.76281	0.761207		-3.81761	6.76281	1.05578e-06	down4h
4215	0.0641083	8.08084	0.692854		-2.35351	8.08084	5.95441e-09	down4h
4242	0.0158027	5.70459	0.933474		-1.52562	5.70459	3.38709e-06	down4h
4245	-0.0407543	7.53047	0.823303		-2.11913	7.53047	7.12611e-08	down4h
4248	0.190996	1.17279	0.52599		-2.16252	1.17279	0.000402867	down4h
4261	0.233885	3.62482	0.522551		-1.30934	3.62482	0.00479572	down4h
4289	0.152865	6.54257	0.519552		-1.7049	6.54257	1.04808e-05	down4h
4298	0.110503	6.51911	0.548468		-1.47904	6.51911	3.13106e-06	down4h
4299	0.232389	7.00038	0.608932		-2.69001	7.00038	0.000100009	down4h
4332	-0.282061	11.1332	0.132401		-1.13588	11.1332	2.97658e-05	down4h
4335	0.0889141	6.39998	0.660043		-1.57802	6.39998	4.80904e-06	down4h
4350	-0.270006	2.03259	0.352277		-1.17145	2.03259	0.00441697	down4h
4358	-0.128917	0.881447	0.628868		-1.13442	0.881447	0.00719347	down4h
4361	0.0028121	2.97186	0.990857		-1.22763	2.97186	0.000587263	down4h
440122	-0.069054	-1.70398	0.928541		-3.08683	-1.70398	0.0173207	down4h
440193	0.172685	3.74687	0.596093		-1.60045	3.74687	0.000560156	down4h
440423	0.272407	0.510127	0.419988		-2.08098	0.510127	0.000274735	down4h
440465	-0.326043	2.79513	0.120777		-4.50658	2.79513	5.55409e-09	down4h
441191	0.111348	0.728805	0.754552		-1.303	0.728805	0.0165083	down4h
441251	0.0621972	-1.41787	0.937798		-2.80909	-1.41787	0.0104367	down4h
441531	-0.00842264	3.19987	0.968877		-1.34996	3.19987	0.000108529	down4h
442421	0.518998	-0.817785	0.323991		-4.14327	-0.817785	0.000595474	down4h
442590	-0.423995	-0.964778	0.451537		-2.28773	-0.964778	0.00317292	down4h
444	0.192069	5.80605	0.515395		-1.27198	5.80605	0.000912492	down4h
445329	-0.122013	3.79047	0.580336		-1.60385	3.79047	1.3993e-05	down4h
445577	0.460077	3.09784	0.478925		-1.68436	3.09784	0.0320818	down4h
4481	-0.487091	-1.6844	0.555945		-6.25124	-1.6844	0.0106237	down4h
4534	-0.0669722	3.85098	0.771209		-2.58643	3.85098	3.17608e-07	down4h
4591	0.184143	1.75881	0.400805		-2.52601	1.75881	3.67186e-06	down4h
4601	-0.110665	4.67445	0.58494		-1.64191	4.67445	3.70191e-06	down4h
4644	0.28206	7.05379	0.467958		-1.28272	7.05379	0.00576703	down4h
4648	-0.106593	3.9723	0.637897		-1.53344	3.9723	2.86999e-05	down4h
4660	0.300123	7.91715	0.408335		-2.69372	7.91715	9.6382e-06	down4h
4665	-0.0845026	2.28054	0.733691		-3.21689	2.28054	6.09982e-07	down4h
4669	-0.0659764	0.705468	0.810648		-1.08011	0.705468	0.00974623	down4h
4671	0.0384198	8.77912	0.878046		-3.02286	8.77912	6.88745e-08	down4h
4677	-0.0122632	3.83914	0.948043		-1.02753	3.83914	0.000203625	down4h
4690	-0.0456322	2.84988	0.850687		-1.90541	2.84988	1.09037e-05	down4h
472	0.15918	6.55053	0.68281		-1.35869	6.55053	0.00441655	down4h
473	0.175343	8.49357	0.47994		-2.92607	8.49357	7.68604e-08	down4h
474170	0.209411	3.56523	0.423764		-1.89471	3.56523	2.37768e-05	down4h
474344	-0.144589	2.77832	0.614295		-1.70846	2.77832	0.00011814	down4h
474383	-0.224992	4.72197	0.258338		-1.45777	4.72197	9.26725e-06	down4h
474384	-0.237357	4.81026	0.227313		-1.40787	4.81026	1.05859e-05	down4h
4756	-0.561326	-0.117861	0.19746		-2.44285	-0.117861	0.00885384	down4h
4771	-0.00795088	2.05795	0.978657		-3.03403	2.05795	1.25503e-06	down4h
4775	0.116559	5.67098	0.577101		-3.04333	5.67098	1.01902e-08	down4h
4778	-0.192298	7.73221	0.384742		-3.29046	7.73221	6.52529e-09	down4h
4779	0.10889	5.22816	0.598286		-1.74995	5.22816	2.2525e-06	down4h
4784	-0.358409	0.581801	0.251271		-1.5955	0.581801	0.000868189	down4h
4798	0.376002	4.17443	0.133441		-1.54267	4.17443	4.58268e-05	down4h
4810	0.223246	4.89213	0.549058		-1.928	4.89213	0.000318678	down4h
4820	0.230757	6.14509	0.289357		-1.01833	6.14509	0.000409016	down4h
4824	-0.317615	1.23108	0.301727		-2.53598	1.23108	5.53382e-05	down4h
4832	-0.00701978	0.667429	0.982418		-1.09127	0.667429	0.0314818	down4h
4854	-0.0128897	-0.435443	0.982231		-1.82191	-0.435443	0.023576	down4h
489	0.0753109	8.60944	0.66818		-1.6061	8.60944	7.97277e-07	down4h
4899	-0.0846856	3.7254	0.668704		-1.49493	3.7254	1.11698e-05	down4h
4905	0.138272	3.9666	0.578942		-1.74094	3.9666	2.59959e-05	down4h
4923	-0.212988	-1.13146	0.700291		-2.29093	-1.13146	0.0269871	down4h
4926	0.345775	5.81975	0.207403		-1.06031	5.81975	0.00169584	down4h
493	0.208182	6.59901	0.560757		-1.50282	6.59901	0.00121397	down4h
493753	-0.307502	2.13824	0.189689		-2.09457	2.13824	4.47189e-06	down4h
493812	-0.255973	1.68419	0.269156		-3.38218	1.68419	1.63993e-07	down4h
4968	-0.225387	1.19796	0.352302		-1.08407	1.19796	0.00245307	down4h
4974	-0.412518	1.53467	0.1631		-2.6878	1.53467	0.000147626	down4h
49856	-0.191108	3.54562	0.338008		-2.64641	3.54562	3.92741e-08	down4h
4987	-0.0241717	3.77297	0.901958		-2.96512	3.77297	1.48146e-08	down4h
5000	-0.297636	3.20525	0.179529		-1.47986	3.20525	2.94281e-05	down4h
5013	-0.177654	2.72559	0.432205		-3.28611	2.72559	1.97542e-07	down4h
5018	-0.0983695	4.94564	0.612333		-1.26482	4.94564	2.62468e-05	down4h
5023	0.125241	7.30663	0.465061		-1.35412	7.30663	3.3065e-06	down4h
5045	0.00183071	8.10906	0.99161		-1.29415	8.10906	6.7468e-06	down4h
50484	-0.0716698	6.16888	0.752679		-1.67669	6.16888	8.54814e-06	down4h
5049	-0.0227307	5.56931	0.908622		-1.22444	5.56931	4.88791e-05	down4h
50619	0.040251	6.98509	0.838804		-1.70145	6.98509	1.7143e-06	down4h
50813	-0.0671675	3.7552	0.730399		-1.5519	3.7552	7.47408e-06	down4h
50855	-0.141059	1.33219	0.56273		-1.7695	1.33219	0.000198447	down4h
50861	-0.607164	1.09238	0.0322568		-1.3041	1.09238	0.00221107	down4h
50862	-0.131624	6.94652	0.450602		-1.13631	6.94652	2.25727e-05	down4h
5096	-0.0338008	0.519803	0.903049		-1.09916	0.519803	0.0110046	down4h
51005	0.0326652	4.42951	0.890783		-1.385	4.42951	9.82173e-05	down4h
51010	-0.239296	1.85286	0.411677		-1.14902	1.85286	0.00403145	down4h
51022	-0.709052	0.281197	0.121767		-3.43598	0.281197	0.00271862	down4h
51028	-0.148656	3.50812	0.505066		-1.44564	3.50812	5.52952e-05	down4h
51029	-0.00849506	2.65486	0.97739		-2.02176	2.65486	1.0647e-05	down4h
51058	-0.0900153	-0.0770628	0.826918		-1.34377	-0.0770628	0.0195838	down4h
51063	-0.197757	0.767858	0.525751		-1.45105	0.767858	0.00416802	down4h
51069	-0.623768	0.548544	0.083857		-1.71288	0.548544	0.00320441	down4h
51076	-0.370451	3.18859	0.105552		-1.95014	3.18859	3.37223e-06	down4h
5108	0.101777	4.86249	0.733576		-2.07197	4.86249	2.19954e-05	down4h
51082	-0.11773	3.40726	0.632099		-1.24496	3.40726	0.000356757	down4h
51096	0.0547634	2.02164	0.813335		-1.28919	2.02164	0.000705333	down4h
51099	-0.138992	7.15749	0.454037		-1.59037	7.15749	1.5745e-06	down4h
51103	-0.318148	2.13657	0.357526		-1.23471	2.13657	0.00661812	down4h
51104	-0.208135	2.50796	0.365082		-1.28591	2.50796	0.000276886	down4h
5111	-0.328281	1.99784	0.145879		-1.41821	1.99784	0.000428136	down4h
51110	-0.885924	-1.08671	0.120992		-1.52874	-1.08671	0.0284796	down4h
51112	0.129057	4.81205	0.509816		-1.37935	4.81205	1.4253e-05	down4h
51122	-0.26052	2.71244	0.229535		-1.19609	2.71244	0.000261251	down4h
51135	-0.0192936	5.42477	0.919946		-1.12912	5.42477	7.1955e-05	down4h
51147	-0.225915	4.20294	0.339694		-1.11824	4.20294	0.000490238	down4h
51155	-0.207528	6.27505	0.500746		-1.08003	6.27505	0.00407085	down4h
51163	-0.104886	1.55462	0.721461		-1.3614	1.55462	0.00131185	down4h
51168	0.717106	-2.02181	0.412625		-5.77116	-2.02181	0.0158215	down4h
51185	-0.246522	3.38203	0.289329		-1.66869	3.38203	1.71124e-05	down4h
51192	-0.15884	6.63876	0.625639		-1.7399	6.63876	0.000181431	down4h
51199	0.267374	8.57994	0.427129		-1.98766	8.57994	6.80781e-05	down4h
51205	0.58676	0.990651	0.0388477		-1.00701	0.990651	0.00795107	down4h
51239	-0.0729509	-1.06581	0.899194		-2.49125	-1.06581	0.020448	down4h
5125	0.418689	0.311106	0.198471		-1.07189	0.311106	0.0300576	down4h
51251	-0.377825	4.3024	0.138771		-1.55066	4.3024	4.40893e-05	down4h
51257	-0.0331522	4.15024	0.880461		-1.16512	4.15024	0.000250074	down4h
51267	0.0811693	2.16444	0.703749		-1.51242	2.16444	4.42882e-05	down4h
51272	-0.0871071	5.23619	0.650501		-2.63744	5.23619	1.92675e-08	down4h
51274	-0.028793	7.67906	0.895007		-3.12103	7.67906	1.10757e-08	down4h
51279	0.028243	6.88496	0.875206		-1.28717	6.88496	1.03301e-05	down4h
51281	0.00757736	1.07447	0.977734		-1.44339	1.07447	0.000653123	down4h
51311	-0.17151	8.19364	0.515183		-1.35493	8.19364	0.000208799	down4h
51313	-0.525717	-1.24657	0.356265		-3.51824	-1.24657	0.00262322	down4h
51326	0.403687	5.07077	0.37354		-1.78972	5.07077	0.00212331	down4h
51330	-0.366138	3.38646	0.126025		-7.90567	3.38646	1.59929e-09	down4h
51337	-0.634386	-1.30917	0.272867		-1.77821	-1.30917	0.0351972	down4h
5134	-0.341527	2.36921	0.12718		-1.31595	2.36921	0.00013628	down4h
51362	-0.0444688	4.13627	0.822481		-2.70197	4.13627	2.57814e-08	down4h
51364	0.370049	0.193851	0.333449		-1.9058	0.193851	0.00165369	down4h
51377	-0.331177	1.46499	0.208211		-1.28834	1.46499	0.00183447	down4h
51379	0.0390944	6.27262	0.837163		-1.99576	6.27262	2.21579e-07	down4h
51385	0.109738	1.20243	0.676004		-1.01197	1.20243	0.00709411	down4h
5140	0.319051	6.15949	0.400027		-1.63106	6.15949	0.000999869	down4h
51409	0.291929	-0.0795124	0.478651		-2.22749	-0.0795124	0.00812956	down4h
51411	-0.0938257	8.79721	0.549993		-1.14344	8.79721	7.3177e-06	down4h
51427	0.117117	3.85307	0.699187		-1.84342	3.85307	0.000169086	down4h
51434	-0.16563	3.08425	0.488597		-1.06586	3.08425	0.00105493	down4h
51441	-0.131351	3.71513	0.499676		-1.52597	3.71513	6.13299e-06	down4h
51444	-0.144044	4.34326	0.580494		-1.45417	4.34326	0.000173901	down4h
51449	-0.46564	1.41054	0.0738504		-1.206	1.41054	0.00157632	down4h
51460	0.150903	0.186699	0.642391		-1.35665	0.186699	0.0049751	down4h
51479	0.176775	5.66841	0.5614		-1.49833	5.66841	0.00034516	down4h
51496	-0.0224788	3.40904	0.943824		-1.34321	3.40904	0.00174998	down4h
51527	-0.312841	3.02229	0.362466		-1.17748	3.02229	0.00869906	down4h
51528	-0.315961	3.8008	0.164285		-3.09928	3.8008	2.69027e-08	down4h
5153	0.2188	2.77809	0.327563		-1.22527	2.77809	0.000303653	down4h
51531	0.210651	3.89232	0.2945		-1.18679	3.89232	8.1129e-05	down4h
51533	-0.18956	0.128771	0.546443		-1.58075	0.128771	0.00687145	down4h
51534	-0.288197	2.90007	0.202654		-1.25882	2.90007	0.000143553	down4h
51562	-0.27644	-0.0892442	0.510748		-3.1201	-0.0892442	0.00073899	down4h
51573	-0.190962	5.06854	0.338316		-2.52182	5.06854	4.19452e-08	down4h
51603	-0.271813	1.21803	0.280501		-1.50481	1.21803	0.000234843	down4h
5162	-0.361269	2.11406	0.127312		-1.65628	2.11406	4.68362e-05	down4h
51621	0.0964154	8.09249	0.717592		-3.32895	8.09249	5.53802e-08	down4h
5163	0.139236	4.27893	0.527217		-1.04885	4.27893	0.000513277	down4h
5165	0.0749569	6.59697	0.699677		-2.24624	6.59697	8.33441e-08	down4h
5166	-0.602523	1.48005	0.0248716		-3.72245	1.48005	2.99068e-07	down4h
51665	-0.0985248	1.82026	0.660165		-1.70512	1.82026	3.01053e-05	down4h
51684	0.0293838	2.73044	0.90436		-2.83719	2.73044	8.0016e-07	down4h
5170	0.1821	7.17979	0.575414		-2.17895	7.17979	2.42079e-05	down4h
51719	-0.13937	7.41279	0.514811		-1.13086	7.41279	0.000157921	down4h
51720	0.0107367	6.14785	0.954124		-1.87016	6.14785	3.68383e-07	down4h
51728	0.217106	0.699175	0.56134		-1.18921	0.699175	0.0230932	down4h
5175	-0.027072	8.55101	0.900161		-1.57718	8.55101	8.53795e-06	down4h
5176	0.158912	0.0260248	0.632732		-1.61212	0.0260248	0.00148366	down4h
51768	-0.170101	2.63184	0.456442		-2.30155	2.63184	1.42518e-06	down4h
51780	0.194856	7.54999	0.506362		-1.15433	7.54999	0.00170226	down4h
5189	-0.260918	2.11183	0.294055		-2.02472	2.11183	1.9153e-05	down4h
5190	0.14817	3.80016	0.439844		-2.53568	3.80016	3.74907e-08	down4h
5193	-0.091287	0.430818	0.806594		-2.33047	0.430818	0.000495969	down4h
5208	0.128771	4.28892	0.743974		-2.834	4.28892	3.25046e-05	down4h
5210	-0.0262837	6.63812	0.881615		-3.99237	6.63812	9.95125e-11	down4h
5223	-0.254654	6.40239	0.239607		-1.28296	6.40239	5.11496e-05	down4h
5224	0.758464	-0.0237673	0.038904		-2.42336	-0.0237673	0.00101794	down4h
5229	-0.0771239	3.0972	0.71498		-1.31729	3.0972	7.85202e-05	down4h
5239	-0.119341	3.14788	0.559252		-1.70423	3.14788	6.54249e-06	down4h
5279	-0.431348	2.02036	0.0798254		-1.31888	2.02036	0.00033628	down4h
5291	0.0770877	4.33432	0.775942		-2.29322	4.33432	4.43108e-06	down4h
5293	0.11788	9.72842	0.544559		-2.12333	9.72842	1.28333e-07	down4h
5295	-0.215459	4.44848	0.473559		-2.37174	4.44848	7.05311e-06	down4h
5316	0.103794	3.93886	0.650258		-1.01727	3.93886	0.00119767	down4h
5321	-0.23626	0.403625	0.435914		-1.43408	0.403625	0.00382847	down4h
5330	0.249113	8.75902	0.199621		-1.24783	8.75902	1.98743e-05	down4h
53339	-0.163425	3.40907	0.487664		-1.22997	3.40907	0.000298012	down4h
5336	0.23859	7.90519	0.359773		-1.14214	7.90519	0.000699044	down4h
5342	0.306775	1.91913	0.255749		-1.76337	1.91913	5.88173e-05	down4h
5343	0.283328	2.35592	0.261681		-1.75771	2.35592	2.68454e-05	down4h
535	-0.010689	6.22716	0.952858		-1.26228	6.22716	1.32374e-05	down4h
5372	-0.0274703	2.25515	0.908505		-1.90795	2.25515	4.67036e-05	down4h
538	0.186687	5.34917	0.620627		-1.16765	5.34917	0.00887851	down4h
53829	-0.451325	8.56726	0.0201037		-2.47791	8.56726	7.17309e-09	down4h
53840	-0.532862	-1.80121	0.492988		-2.8962	-1.80121	0.022606	down4h
53918	-0.419915	4.31118	0.0480304		-4.79523	4.31118	3.01481e-10	down4h
53944	0.229288	4.22015	0.333115		-1.26374	4.22015	0.000186027	down4h
5395	0.404872	1.44774	0.0917829		-1.73136	1.44774	4.95679e-05	down4h
54	-0.290025	2.78899	0.173758		-2.01723	2.78899	1.47207e-06	down4h
54014	0.146384	4.93857	0.715677		-1.027	4.93857	0.0252759	down4h
54093	-0.218122	1.61828	0.360888		-2.29981	1.61828	7.51635e-06	down4h
54106	0.114887	4.57224	0.54989		-1.87048	4.57224	5.64659e-07	down4h
5411	-0.233133	5.43925	0.292852		-1.02018	5.43925	0.000502505	down4h
5413	0.236697	2.92764	0.25306		-1.34494	2.92764	6.85278e-05	down4h
54187	-0.265427	3.34225	0.331925		-1.28016	3.34225	0.000778286	down4h
5429	0.0614174	1.14491	0.83093		-1.07169	1.14491	0.00722442	down4h
5431	-0.088123	5.57229	0.673986		-1.65529	5.57229	4.33733e-06	down4h
5432	-0.101866	5.18874	0.603595		-1.42269	5.18874	1.06221e-05	down4h
5436	-0.290579	2.92586	0.357514		-1.39513	2.92586	0.00139469	down4h
54407	-0.106034	7.06579	0.721428		-1.23852	7.06579	0.00124655	down4h
54432	-0.158202	4.44694	0.478739		-1.22628	4.44694	0.000155339	down4h
54434	0.239434	6.16602	0.43355		-3.38575	6.16602	2.38336e-07	down4h
54441	0.0664262	2.64156	0.74881		-1.10778	2.64156	0.000448497	down4h
54442	0.105072	3.41523	0.672388		-1.79626	3.41523	1.75442e-05	down4h
54467	0.0755754	3.29325	0.835955		-1.2537	3.29325	0.00772675	down4h
54480	0.024247	6.20972	0.901124		-2.13177	6.20972	1.59765e-07	down4h
54497	0.0435725	3.99071	0.886563		-1.40523	3.99071	0.000874248	down4h
54502	0.107824	7.83902	0.540635		-1.20459	7.83902	1.46991e-05	down4h
54505	-0.0432033	2.41004	0.840156		-1.04943	2.41004	0.000739239	down4h
54507	0.169648	4.84195	0.494501		-1.52578	4.84195	5.75984e-05	down4h
54521	0.294017	3.16172	0.271822		-1.23382	3.16172	0.000887492	down4h
54536	-0.0142948	4.71661	0.947938		-1.54444	4.71661	1.7205e-05	down4h
54540	0.190841	6.27456	0.314581		-1.01509	6.27456	0.000128628	down4h
54545	-0.0197923	4.0581	0.944944		-2.36973	4.0581	1.43778e-05	down4h
54550	-0.194151	3.43946	0.517435		-1.99724	3.43946	8.08098e-05	down4h
54581	0.277223	0.577611	0.360591		-2.08445	0.577611	0.000185999	down4h
54583	-0.0715911	8.05967	0.713907		-2.61697	8.05967	1.70451e-08	down4h
54584	-0.449098	0.204844	0.17042		-1.71345	0.204844	0.00426348	down4h
5460	0.150471	0.0536661	0.633674		-2.57975	0.0536661	0.000380553	down4h
54621	0.154862	2.79505	0.497423		-1.77054	2.79505	1.7193e-05	down4h
54629	0.240127	2.82368	0.280225		-2.36662	2.82368	8.77117e-07	down4h
54662	-0.0451215	3.12862	0.843665		-2.57205	3.12862	5.08809e-07	down4h
54664	-0.450534	1.92145	0.0848562		-1.71113	1.92145	4.83718e-05	down4h
54665	-0.0643812	3.95058	0.789857		-1.38133	3.95058	0.000202521	down4h
54681	-0.117748	1.06596	0.658533		-1.26525	1.06596	0.00357479	down4h
54682	-0.111832	6.33823	0.55973		-3.09737	6.33823	2.87129e-09	down4h
54704	-0.288925	2.08368	0.263126		-1.27418	2.08368	0.00189787	down4h
54762	0.0250981	4.304	0.892846		-2.23142	4.304	9.51824e-08	down4h
54778	0.11665	5.6151	0.693225		-1.24187	5.6151	0.0012124	down4h
54784	0.300033	0.464692	0.472051		-1.89873	0.464692	0.00455323	down4h
54785	0.0504682	3.1513	0.795181		-2.99533	3.1513	2.15213e-08	down4h
54799	-0.0702499	4.11338	0.779439		-2.004	4.11338	6.398e-06	down4h
54800	-0.15293	5.42979	0.456873		-1.4591	5.42979	1.10453e-05	down4h
54801	-0.604206	1.37919	0.106655		-1.98668	1.37919	0.000657886	down4h
54807	0.0092633	4.54741	0.960982		-1.22458	4.54741	3.59806e-05	down4h
54813	0.00533579	3.54116	0.983502		-1.08342	3.54116	0.00192097	down4h
54816	-0.0214284	0.971924	0.93246		-1.97056	0.971924	6.09846e-05	down4h
54826	-0.157011	0.766203	0.575488		-1.12454	0.766203	0.00300286	down4h
54834	0.214569	4.356	0.307257		-1.34871	4.356	3.61359e-05	down4h
54849	0.0318211	7.5306	0.84776		-2.05017	7.5306	3.51764e-08	down4h
54853	0.136062	4.18917	0.526254		-1.49668	4.18917	1.98053e-05	down4h
54858	0.0111175	4.2818	0.953598		-2.27596	4.2818	9.76984e-08	down4h
548593	0.0503651	3.63581	0.829587		-1.01424	3.63581	0.00131616	down4h
54861	0.0331404	8.15378	0.894907		-1.83977	8.15378	9.17452e-06	down4h
54862	0.16783	3.50482	0.407611		-1.06844	3.50482	0.000310164	down4h
54863	0.181527	4.25305	0.401282		-1.07552	4.25305	0.00037501	down4h
54868	0.0932863	3.09008	0.696331		-1.29039	3.09008	0.000327175	down4h
54878	0.100986	4.59182	0.72264		-1.25682	4.59182	0.000865941	down4h
54884	-0.241495	1.92642	0.33245		-1.50344	1.92642	0.000304555	down4h
54888	0.0589775	2.98606	0.768697		-1.4711	2.98606	2.43576e-05	down4h
54890	-0.145529	5.39093	0.437733		-1.38754	5.39093	7.91759e-06	down4h
54893	0.0648508	6.59769	0.800202		-2.63963	6.59769	3.60691e-07	down4h
54896	0.462779	2.49014	0.147578		-1.48117	2.49014	0.000820664	down4h
54899	0.0429271	5.33265	0.853924		-1.44596	5.33265	5.10123e-05	down4h
54904	0.199028	6.63432	0.462112		-1.94852	6.63432	1.06435e-05	down4h
54906	0.283471	4.01154	0.536562		-1.05492	4.01154	0.0430095	down4h
54915	-0.0387008	3.91297	0.841472		-1.67894	3.91297	3.06462e-06	down4h
54916	0.00501419	3.44258	0.982865		-1.5115	3.44258	5.33086e-05	down4h
54920	0.01616	2.8196	0.937016		-3.12307	2.8196	3.18795e-08	down4h
54925	-0.26514	3.19353	0.281017		-1.55325	3.19353	6.81626e-05	down4h
54930	-0.0780168	5.01409	0.674976		-1.5442	5.01409	2.8935e-06	down4h
54934	-0.110611	2.40329	0.60653		-1.08558	2.40329	0.000734892	down4h
54936	-0.190689	3.25242	0.408177		-1.28638	3.25242	0.000166786	down4h
54941	-0.250008	2.02219	0.292527		-1.52824	2.02219	0.000231375	down4h
54942	-0.517971	2.2036	0.0572981		-1.08723	2.2036	0.00281776	down4h
54951	-0.366646	2.53461	0.2071		-1.26386	2.53461	0.00194938	down4h
54961	0.0354619	5.43376	0.849452		-1.50758	5.43376	3.43021e-06	down4h
54968	-0.427303	2.67919	0.200354		-1.70573	2.67919	0.000566407	down4h
54978	0.00253968	3.7474	0.989645		-1.31282	3.7474	3.01998e-05	down4h
54989	-0.132879	3.12497	0.641712		-2.47805	3.12497	4.22873e-06	down4h
54993	-0.345534	-0.206002	0.424455		-2.37861	-0.206002	0.000880174	down4h
55	0.100521	4.25224	0.607889		-2.09543	4.25224	2.52177e-07	down4h
55001	0.301259	0.970841	0.228521		-2.52881	0.970841	8.74545e-06	down4h
55002	0.0260014	5.31692	0.899848		-2.19956	5.31692	2.74621e-07	down4h
5501	-0.283643	5.31432	0.158717		-2.04887	5.31432	2.26994e-07	down4h
55016	-0.215253	1.02536	0.425391		-1.19169	1.02536	0.00375498	down4h
55027	-0.375091	0.762882	0.272133		-2.06602	0.762882	0.00105338	down4h
55028	-0.149006	1.6608	0.63065		-1.88578	1.6608	0.000117258	down4h
55039	0.0691347	1.9763	0.739274		-1.24208	1.9763	0.000405977	down4h
55051	0.0839513	3.66396	0.723903		-1.57633	3.66396	3.8012e-05	down4h
55054	-0.231447	3.13505	0.261202		-2.39037	3.13505	1.99903e-07	down4h
55057	-0.482501	-0.165826	0.171385		-1.02164	-0.165826	0.0260068	down4h
55062	-0.037845	4.26613	0.842965		-2.15278	4.26613	1.95413e-07	down4h
55066	0.114776	4.4358	0.774552		-1.73401	4.4358	0.00134009	down4h
55071	-0.543568	1.44382	0.0705363		-1.57755	1.44382	0.000440623	down4h
55073	0.551215	5.4608	0.148278		-1.90903	5.4608	0.000291357	down4h
55074	-0.0651923	3.67268	0.777767		-1.71345	3.67268	1.32303e-05	down4h
5509	-0.221728	5.00731	0.262681		-4.02427	5.00731	5.73971e-10	down4h
55094	0.0525283	2.14046	0.838747		-3.25389	2.14046	3.79502e-07	down4h
55102	0.317747	5.07933	0.454433		-1.43262	5.07933	0.00565215	down4h
55103	-0.056222	4.02045	0.842062		-1.31143	4.02045	0.000772892	down4h
55105	0.156571	-1.29839	0.770385		-2.89363	-1.29839	0.0162903	down4h
55106	0.0114948	1.13005	0.96483		-2.10045	1.13005	1.99205e-05	down4h
55109	-0.228381	3.07	0.338188		-2.17747	3.07	2.86071e-06	down4h
55122	-0.181442	6.58088	0.39019		-1.40762	6.58088	1.85056e-05	down4h
55125	0.139555	3.55565	0.673251		-2.46454	3.55565	2.67047e-05	down4h
55138	-0.728442	-0.870915	0.144241		-3.31777	-0.870915	0.00562655	down4h
55139	-0.195302	4.75695	0.387704		-2.48939	4.75695	1.82606e-07	down4h
55143	-0.0799208	0.375984	0.817245		-1.29588	0.375984	0.021214	down4h
55145	-0.190095	2.45095	0.485169		-1.81456	2.45095	7.71745e-05	down4h
55148	-0.0642247	3.02732	0.800281		-1.1566	3.02732	0.00156405	down4h
55152	-0.0274274	2.83586	0.900005		-1.9124	2.83586	7.71855e-06	down4h
55167	0.000306237	6.56846	0.998817		-1.21887	6.56846	6.51874e-05	down4h
55175	0.533882	-0.444623	0.291532		-2.2922	-0.444623	0.00955434	down4h
55176	-0.129428	3.77283	0.556713		-1.09382	3.77283	0.000715573	down4h
55181	-0.240545	1.87632	0.31681		-1.71101	1.87632	3.97081e-05	down4h
55182	-0.12752	3.5695	0.5447		-1.96231	3.5695	1.57531e-06	down4h
55196	0.151312	10.6855	0.582457		-1.2633	10.6855	0.000532917	down4h
55197	-0.180307	3.4915	0.383625		-2.17491	3.4915	4.84812e-07	down4h
55198	0.0493429	5.48236	0.797038		-1.96788	5.48236	3.28529e-07	down4h
55201	0.0264735	5.38581	0.890807		-1.47765	5.38581	5.84423e-06	down4h
55208	0.0306915	2.62827	0.895659		-1.53462	2.62827	0.000123124	down4h
55213	0.0437299	3.55839	0.864887		-1.90468	3.55839	1.69121e-05	down4h
55217	0.194634	3.97968	0.36295		-2.51192	3.97968	1.27716e-07	down4h
55223	0.197894	3.77807	0.453709		-1.17869	3.77807	0.00101564	down4h
55251	-0.167924	4.59627	0.380003		-1.94531	4.59627	3.72067e-07	down4h
55252	0.409151	5.52022	0.434069		-2.10555	5.52022	0.00195396	down4h
55262	0.04949	6.40239	0.781024		-3.11715	6.40239	1.14449e-09	down4h
55276	0.0350675	5.02131	0.853991		-2.7223	5.02131	1.78067e-08	down4h
55281	0.0945055	7.22746	0.646157		-1.43524	7.22746	1.27352e-05	down4h
55288	-0.138751	5.05855	0.56154		-2.17711	5.05855	1.31101e-06	down4h
552889	0.0118264	3.65117	0.952653		-1.25724	3.65117	6.10254e-05	down4h
55290	0.231726	1.39593	0.333026		-2.8507	1.39593	2.7698e-06	down4h
55295	0.12761	0.776199	0.685469		-1.13797	0.776199	0.0232805	down4h
55303	-0.24049	7.16062	0.208846		-2.27403	7.16062	4.12552e-08	down4h
55320	-0.191564	3.70701	0.551598		-2.85553	3.70701	3.32785e-06	down4h
55322	-0.281882	1.53397	0.269192		-1.19564	1.53397	0.00108671	down4h
55324	-0.0739631	3.81176	0.70648		-1.21487	3.81176	7.69594e-05	down4h
55330	-0.444778	1.61612	0.0910154		-2.41295	1.61612	6.87213e-06	down4h
55339	0.232314	4.4217	0.269073		-1.07808	4.4217	0.000237808	down4h
55343	-0.210597	1.37996	0.365959		-1.09005	1.37996	0.00325227	down4h
55344	0.0885021	2.07586	0.776375		-1.12761	2.07586	0.0098005	down4h
55347	-0.307661	0.630792	0.32609		-2.10426	0.630792	0.000345487	down4h
55356	0.0189532	5.24988	0.939839		-2.04131	5.24988	4.18592e-06	down4h
55357	0.0733441	4.16969	0.73152		-3.15713	4.16969	1.36265e-08	down4h
55374	-0.047787	3.4979	0.801797		-1.30496	3.4979	3.19048e-05	down4h
55389	-0.213479	2.6974	0.625664		-2.02786	2.6974	0.00147671	down4h
554203	0.0687396	1.80656	0.755025		-2.01328	1.80656	8.95323e-06	down4h
554313	-0.201482	2.01865	0.455328		-1.00747	2.01865	0.00607505	down4h
55432	0.00427983	4.17577	0.98397		-2.06731	4.17577	8.13653e-07	down4h
55512	-0.00446542	0.0066744	0.991716		-1.20234	0.0066744	0.0427594	down4h
55526	-0.0643175	5.31167	0.72656		-1.95894	5.31167	2.25259e-07	down4h
55529	0.0914391	5.49919	0.660023		-3.13536	5.49919	7.37265e-09	down4h
55573	-0.187437	6.89874	0.312446		-1.69156	6.89874	7.67876e-07	down4h
55582	0.145913	4.68168	0.583876		-2.65372	4.68168	8.37813e-07	down4h
55585	-0.0108543	5.35084	0.962631		-1.37041	5.35084	7.28192e-05	down4h
55589	0.25419	5.31785	0.381314		-1.77345	5.31785	5.64938e-05	down4h
55602	-0.651436	2.80015	0.0139895		-2.68631	2.80015	4.42973e-07	down4h
55603	-0.29073	3.817	0.218991		-1.64	3.817	1.57662e-05	down4h
55614	0.345194	0.253792	0.277686		-1.40838	0.253792	0.00961846	down4h
5562	-0.0476611	5.20526	0.866945		-1.24778	5.20526	0.000914264	down4h
55625	-0.037413	6.3907	0.845832		-1.88537	6.3907	4.67539e-07	down4h
55636	0.171058	6.22657	0.396045		-1.16393	6.22657	7.10054e-05	down4h
5564	-0.217365	3.9342	0.265229		-1.86034	3.9342	7.59054e-07	down4h
5565	0.0928211	1.37105	0.765462		-2.04291	1.37105	0.000204872	down4h
55652	-0.159816	3.76876	0.464633		-2.03721	3.76876	1.31989e-06	down4h
55657	-0.18775	3.58886	0.385707		-1.43544	3.58886	3.42934e-05	down4h
55658	-0.126095	3.22715	0.558076		-1.06357	3.22715	0.000613926	down4h
55663	-0.113428	1.63883	0.664048		-1.4633	1.63883	0.000992067	down4h
55670	0.0447813	1.01898	0.876251		-1.44599	1.01898	0.00149827	down4h
55680	-0.181767	0.972979	0.542183		-2.02247	0.972979	0.000407294	down4h
55687	-0.289203	1.55383	0.238225		-2.75925	1.55383	1.34417e-06	down4h
55689	0.0432074	3.3437	0.850049		-2.43819	3.3437	5.41164e-07	down4h
55695	-0.0369008	3.34627	0.860544		-2.34793	3.34627	2.31312e-07	down4h
55699	-0.0434437	2.35702	0.864577		-1.48006	2.35702	0.00031047	down4h
55701	0.0231443	7.01992	0.912265		-1.94359	7.01992	9.66354e-07	down4h
55703	0.0106543	0.282721	0.975147		-1.45983	0.282721	0.0135709	down4h
55711	-0.0659886	4.61493	0.723116		-1.24211	4.61493	3.09658e-05	down4h
55715	-0.261901	2.5433	0.206211		-1.84342	2.5433	4.84893e-06	down4h
55719	-0.166254	2.82116	0.547321		-2.19874	2.82116	1.49619e-05	down4h
55737	-0.25951	5.17961	0.242911		-1.61722	5.17961	9.04724e-06	down4h
55744	0.0744962	3.66308	0.719249		-1.44674	3.66308	1.69098e-05	down4h
55751	0.216542	3.02474	0.364293		-1.76365	3.02474	1.6068e-05	down4h
5576	0.20542	3.68039	0.591501		-1.66552	3.68039	0.00164618	down4h
55762	-0.0388859	3.82343	0.84528		-1.51858	3.82343	8.44991e-06	down4h
55768	-0.155328	4.36343	0.425618		-1.15992	4.36343	6.74935e-05	down4h
5577	-0.541677	-0.27222	0.267018		-1.04929	-0.27222	0.0294192	down4h
55781	-0.96519	-0.328611	0.0334155		-1.5981	-0.328611	0.0181912	down4h
55793	0.161946	6.96738	0.417839		-3.37307	6.96738	1.74973e-09	down4h
55794	-0.648556	1.86907	0.0810226		-3.52837	1.86907	8.31615e-06	down4h
55809	0.314943	6.13524	0.367189		-1.73671	6.13524	0.000324177	down4h
55813	-0.0134823	4.08354	0.943107		-1.48368	4.08354	5.98417e-06	down4h
55823	0.0296275	3.26591	0.879461		-1.62596	3.26591	5.28364e-06	down4h
55830	-0.254502	2.17073	0.247278		-1.874	2.17073	7.168e-06	down4h
55846	-0.203607	1.47726	0.447036		-1.30719	1.47726	0.00154086	down4h
5585	0.0590016	6.5935	0.765286		-1.02261	6.5935	0.000201339	down4h
55855	-0.33994	4.26288	0.109085		-2.95573	4.26288	1.60628e-08	down4h
5586	0.152078	7.01325	0.665739		-2.22681	7.01325	4.5936e-05	down4h
55862	-0.335224	3.12035	0.193273		-1.40188	3.12035	0.000223957	down4h
55863	-0.850716	0.856315	0.0399764		-1.34545	0.856315	0.0106973	down4h
55888	0.0769418	0.0974038	0.829672		-4.76701	0.0974038	4.75804e-05	down4h
55893	0.114932	2.3914	0.599692		-1.08586	2.3914	0.000580779	down4h
5590	0.0649708	3.51394	0.741034		-3.09626	3.51394	1.32023e-08	down4h
5591	0.428411	8.17485	0.213149		-1.28191	8.17485	0.00216795	down4h
55924	0.0610981	8.21622	0.749208		-4.54482	8.21622	6.14177e-11	down4h
55930	0.0604222	0.396293	0.859391		-2.06899	0.396293	0.000882106	down4h
5594	0.0382857	8.43395	0.842672		-1.56445	8.43395	2.93562e-06	down4h
55954	-0.138684	3.09073	0.591359		-1.10732	3.09073	0.00155107	down4h
55958	-0.121716	3.21011	0.628305		-1.00511	3.21011	0.00219114	down4h
55959	0.135335	8.39927	0.4858		-1.36304	8.39927	1.09337e-05	down4h
55968	-0.051954	6.66896	0.804002		-1.5879	6.66896	6.22032e-06	down4h
56171	0.778921	0.312175	0.0242518		-1.06219	0.312175	0.0173267	down4h
56172	0.0156606	0.218481	0.969469		-1.29149	0.218481	0.032065	down4h
56181	-0.134992	2.89086	0.505319		-1.05473	2.89086	0.000313381	down4h
5624	-0.218817	0.578762	0.442496		-3.26227	0.578762	7.29549e-06	down4h
56252	0.315978	4.42261	0.152387		-1.13006	4.42261	0.00021903	down4h
56254	0.0383585	5.11346	0.849151		-1.26341	5.11346	4.08218e-05	down4h
56255	0.0896821	6.39112	0.689284		-1.01007	6.39112	0.000673798	down4h
56260	-0.254822	1.02494	0.418099		-1.37084	1.02494	0.00398432	down4h
56261	-0.00448139	7.91364	0.981821		-1.85894	7.91364	6.44985e-07	down4h
56302	0.798063	-1.32265	0.258303		-2.54939	-1.32265	0.0201374	down4h
56339	-0.167377	2.18078	0.443161		-1.89071	2.18078	9.02033e-06	down4h
56413	0.335896	1.77008	0.197685		-3.11796	1.77008	4.18186e-06	down4h
56478	0.260748	3.69782	0.215054		-3.25087	3.69782	1.16788e-08	down4h
56603	0.00252829	3.07569	0.991405		-2.79224	3.07569	3.30969e-07	down4h
5681	0.010059	2.70691	0.964198		-2.16744	2.70691	3.37476e-06	down4h
56848	-0.120171	1.25762	0.626151		-1.24846	1.25762	0.00144691	down4h
56886	0.0904723	6.61267	0.671727		-1.30321	6.61267	4.8398e-05	down4h
56919	0.271431	0.934553	0.452622		-1.91524	0.934553	0.00142409	down4h
56925	-0.410623	2.13375	0.0902923		-3.66316	2.13375	3.3274e-07	down4h
56926	-0.0246107	5.69091	0.894182		-1.86392	5.69091	4.10522e-07	down4h
56929	-0.128717	4.65625	0.621313		-1.33305	4.65625	0.000327208	down4h
56961	-0.556514	-2.04815	0.592964		-2.82217	-2.04815	0.041922	down4h
56980	0.299462	4.07821	0.308505		-1.67822	4.07821	0.000120622	down4h
56996	0.0633376	7.42244	0.707699		-1.71366	7.42244	2.75859e-07	down4h
56997	-0.0522299	5.9222	0.800935		-2.12725	5.9222	3.14207e-07	down4h
57017	-0.31068	1.77516	0.205466		-1.79807	1.77516	3.63123e-05	down4h
57037	-0.301183	1.5955	0.269645		-1.06273	1.5955	0.00635731	down4h
57082	0.310153	-1.44335	0.629926		-3.0312	-1.44335	0.0189208	down4h
57091	0.217573	7.42929	0.41304		-2.81394	7.42929	2.60912e-07	down4h
57095	-0.0481217	3.06207	0.864481		-1.39451	3.06207	0.000743609	down4h
57096	0.00724424	3.84527	0.96961		-2.3953	3.84527	7.88272e-08	down4h
57103	-0.0812759	2.85149	0.703348		-1.69551	2.85149	8.15175e-06	down4h
57105	0.223623	0.7469	0.383777		-3.47763	0.7469	1.3756e-05	down4h
57120	-0.212199	2.2046	0.476232		-1.93184	2.2046	9.83584e-05	down4h
57130	0.0655013	3.50513	0.763618		-1.41661	3.50513	4.98942e-05	down4h
57132	-0.215009	7.2303	0.236107		-1.394	7.2303	3.69263e-06	down4h
57139	0.190064	1.59443	0.402945		-1.1436	1.59443	0.0019852	down4h
57140	-0.031226	6.98999	0.873648		-1.23447	6.98999	3.63343e-05	down4h
57147	-0.148371	3.31048	0.503851		-1.85564	3.31048	6.7674e-06	down4h
57153	-0.0519322	9.58434	0.732996		-1.35068	9.58434	1.02059e-06	down4h
57156	0.408245	2.78254	0.0698346		-1.59849	2.78254	2.43795e-05	down4h
57157	0.309041	2.38841	0.241452		-1.19278	2.38841	0.00138005	down4h
57161	0.036503	6.68139	0.885164		-1.58709	6.68139	4.16192e-05	down4h
57168	-0.101419	1.64785	0.718986		-1.08258	1.64785	0.00875153	down4h
57175	-0.0239965	4.93236	0.902847		-1.1439	4.93236	8.37407e-05	down4h
5718	-0.321585	3.23828	0.137212		-1.88176	3.23828	2.84178e-06	down4h
57184	0.115974	2.87387	0.599155		-2.12663	2.87387	2.96717e-06	down4h
57185	-0.238571	1.55688	0.380188		-1.28863	1.55688	0.000896031	down4h
57205	0.17676	3.03831	0.712539		-1.72671	3.03831	0.00532543	down4h
57210	0.209027	8.13614	0.343191		-1.01427	8.13614	0.000456524	down4h
57212	0.188793	0.864881	0.462408		-1.03939	0.864881	0.0076534	down4h
57215	-0.31966	2.30194	0.251382		-1.87515	2.30194	5.08116e-05	down4h
57232	-0.264794	-0.109641	0.558232		-2.65053	-0.109641	0.00279052	down4h
5728	-0.0688749	9.18422	0.661501		-1.22455	9.18422	3.89096e-06	down4h
57407	-0.0837658	2.91946	0.723438		-1.2401	2.91946	0.000520691	down4h
57447	-0.0625032	-0.186975	0.866619		-1.77849	-0.186975	0.00725459	down4h
57458	0.0944707	8.21094	0.624972		-2.54861	8.21094	1.98281e-08	down4h
57460	0.136755	2.47296	0.544203		-1.35909	2.47296	0.000240886	down4h
57470	-0.0347637	3.06931	0.864838		-2.22884	3.06931	6.13651e-07	down4h
57474	0.267204	1.5878	0.327983		-1.92095	1.5878	6.47369e-05	down4h
57476	0.635696	1.05554	0.0486556		-1.57559	1.05554	0.00201907	down4h
57477	0.459111	-0.231187	0.184462		-1.27767	-0.231187	0.0167792	down4h
57478	0.136959	-0.241966	0.717262		-1.22058	-0.241966	0.0386863	down4h
57479	0.380103	3.92815	0.21977		-2.96872	3.92815	1.38661e-06	down4h
57480	0.0800356	-0.0368841	0.83981		-1.24487	-0.0368841	0.0284222	down4h
57486	0.531032	-0.742057	0.322346		-1.72076	-0.742057	0.00810345	down4h
57498	0.311481	6.8527	0.406086		-1.02935	6.8527	0.0156155	down4h
57501	0.257431	2.66898	0.229592		-1.35583	2.66898	9.81955e-05	down4h
57506	0.0829937	5.65678	0.658142		-2.05704	5.65678	1.47863e-07	down4h
57507	0.197961	2.44419	0.532282		-2.85362	2.44419	6.12868e-06	down4h
57508	-0.172363	-0.529424	0.665323		-3.64367	-0.529424	0.00142385	down4h
57520	0.034316	3.4491	0.896299		-3.53726	3.4491	2.95894e-07	down4h
57532	0.178033	7.36074	0.589224		-2.23449	7.36074	2.26457e-05	down4h
57533	-0.0239257	8.0565	0.912814		-3.39358	8.0565	4.9336e-09	down4h
57541	-0.00709712	4.32877	0.978176		-4.54394	4.32877	4.42964e-09	down4h
57546	0.768931	-1.13514	0.179872		-2.72517	-1.13514	0.00543813	down4h
57547	-0.539776	-0.876448	0.326131		-2.80965	-0.876448	0.00747001	down4h
57558	-0.10082	1.588	0.716708		-3.25077	1.588	2.33912e-06	down4h
57561	-0.33856	7.86495	0.226793		-1.18175	7.86495	0.000857365	down4h
57568	0.231488	6.47936	0.309957		-1.26195	6.47936	0.000103556	down4h
57579	0.0742923	-0.643197	0.876564		-1.44201	-0.643197	0.0287041	down4h
57583	0.0573825	2.58527	0.833183		-1.39413	2.58527	0.000912232	down4h
57585	0.229662	3.45241	0.463786		-1.93779	3.45241	0.000108255	down4h
57590	-0.158088	4.3368	0.626685		-1.86945	4.3368	0.000137652	down4h
57596	0.0187586	0.809533	0.966019		-3.76178	0.809533	0.000281657	down4h
57597	0.381333	-0.191622	0.405102		-1.4869	-0.191622	0.0230477	down4h
57609	0.216117	7.65786	0.560381		-1.18934	7.65786	0.00690826	down4h
57614	0.0298267	5.02946	0.892352		-1.22583	5.02946	0.000130165	down4h
57616	0.344036	4.2746	0.248078		-2.69106	4.2746	1.77289e-06	down4h
57620	0.087926	4.32048	0.669421		-1.57433	4.32048	8.66413e-06	down4h
57630	-0.309038	0.0381059	0.330648		-1.30341	0.0381059	0.0115783	down4h
57633	-0.218497	1.49807	0.366833		-1.02146	1.49807	0.00938201	down4h
57634	0.411541	5.11196	0.263166		-1.16446	5.11196	0.00740279	down4h
57649	0.140687	7.71498	0.530297		-1.12104	7.71498	0.000258908	down4h
57661	0.285533	4.75184	0.24304		-1.41109	4.75184	7.99212e-05	down4h
57680	0.263117	6.34781	0.410352		-1.37062	6.34781	0.000930964	down4h
57685	0.425566	-0.182161	0.437903		-2.01095	-0.182161	0.0227376	down4h
57693	0.214949	3.88931	0.282536		-1.15118	3.88931	8.38907e-05	down4h
57700	-0.0586672	5.42991	0.823657		-2.73708	5.42991	4.18455e-07	down4h
57786	0.0535446	1.67104	0.822148		-1.96795	1.67104	2.7397e-05	down4h
57794	0.0481665	3.80031	0.827948		-1.76451	3.80031	7.45656e-06	down4h
57798	-0.2153	2.28568	0.354959		-1.6097	2.28568	3.13594e-05	down4h
57799	0.0745691	3.84313	0.706696		-3.05515	3.84313	2.2556e-08	down4h
578	-0.100247	4.1557	0.659217		-1.36652	4.1557	7.35005e-05	down4h
57827	-0.0980944	4.50302	0.603155		-1.16427	4.50302	4.97084e-05	down4h
57864	-0.544042	-2.2484	0.605401		-5.67479	-2.2484	0.0211006	down4h
5802	0.235098	0.683404	0.464973		-1.83168	0.683404	0.000514274	down4h
582	0.201684	1.13009	0.601868		-1.40377	1.13009	0.0155786	down4h
5825	-0.17697	0.939838	0.525708		-1.29992	0.939838	0.00504001	down4h
5829	0.0179955	9.63997	0.917124		-1.7265	9.63997	3.25615e-07	down4h
583	0.325886	1.1531	0.224367		-1.40157	1.1531	0.00204039	down4h
5830	0.0472	2.84907	0.812712		-1.62549	2.84907	1.36672e-05	down4h
5834	0.0259098	3.75362	0.907717		-1.12364	3.75362	0.000405876	down4h
58484	-0.0155315	4.82025	0.936985		-1.37215	4.82025	1.47267e-05	down4h
58486	-0.391202	3.20553	0.0930341		-1.83758	3.20553	5.40326e-06	down4h
58487	-0.0202852	3.58389	0.942595		-1.72816	3.58389	8.88876e-05	down4h
58497	0.0907195	4.1936	0.634072		-1.63418	4.1936	2.51737e-06	down4h
585	-0.241787	1.08618	0.554637		-1.16877	1.08618	0.0402888	down4h
58513	0.166288	6.85583	0.49951		-1.18455	6.85583	0.000362031	down4h
5864	0.022923	-0.276476	0.953672		-4.20052	-0.276476	0.000354218	down4h
5867	-0.0850566	1.26889	0.737551		-1.15513	1.26889	0.00340619	down4h
5877	-0.0542156	3.702	0.794133		-1.67367	3.702	8.7877e-06	down4h
5883	0.119609	3.20211	0.553293		-1.74609	3.20211	2.8444e-06	down4h
5893	-0.220358	0.191095	0.511604		-1.37304	0.191095	0.00309298	down4h
5909	0.367308	0.0772777	0.308788		-1.22495	0.0772777	0.0338378	down4h
5921	0.0386492	3.65356	0.85867		-1.66447	3.65356	1.26605e-05	down4h
5922	0.418956	4.61069	0.34859		-2.69653	4.61069	0.000138829	down4h
5933	0.116046	-1.03403	0.805898		-1.72462	-1.03403	0.037392	down4h
59345	-0.070506	5.16051	0.834666		-2.29336	5.16051	3.07152e-05	down4h
59349	0.00120523	4.35048	0.994967		-1.68945	4.35048	2.26962e-06	down4h
595135	-0.77609	-0.0755683	0.0677509		-3.16596	-0.0755683	0.00172397	down4h
5973	-0.0112606	4.65422	0.969121		-1.96364	4.65422	2.73659e-05	down4h
5976	0.11673	7.6624	0.601872		-1.14925	7.6624	0.000207776	down4h
5977	-0.124592	5.78193	0.514728		-1.42192	5.78193	6.635e-06	down4h
5978	0.0963117	4.53739	0.698265		-2.04334	4.53739	4.66684e-06	down4h
5982	-0.104457	3.47309	0.655706		-1.01415	3.47309	0.00137459	down4h
5985	0.0487162	1.45882	0.840802		-2.49675	1.45882	9.34246e-06	down4h
5987	-0.160707	4.00025	0.447138		-3.55596	4.00025	1.08218e-08	down4h
5991	0.292381	2.30963	0.317342		-1.21023	2.30963	0.00328951	down4h
5994	0.513319	-1.12868	0.344612		-2.28494	-1.12868	0.0237455	down4h
5998	0.0327148	5.66668	0.870228		-1.10114	5.66668	0.000124071	down4h
60312	0.33085	3.13125	0.211891		-3.37035	3.13125	5.02284e-07	down4h
60314	-0.00273992	1.41343	0.99242		-1.63602	1.41343	0.000501256	down4h
6039	-0.355186	5.83151	0.238076		-1.08727	5.83151	0.00290228	down4h
6041	0.0692298	6.09771	0.760886		-1.89069	6.09771	2.67399e-06	down4h
60437	0.153512	1.48802	0.57163		-1.67002	1.48802	0.000554553	down4h
6047	-0.145615	5.66185	0.511487		-1.6811	5.66185	6.47172e-06	down4h
6049	0.0600271	3.57031	0.799738		-1.73848	3.57031	1.46134e-05	down4h
60496	-0.308332	1.51464	0.252263		-1.35624	1.51464	0.000769926	down4h
6051	-0.0738883	5.65576	0.706439		-1.15312	5.65576	7.16841e-05	down4h
60561	-0.0121813	1.70711	0.959903		-1.11754	1.70711	0.00179491	down4h
60592	-0.927137	0.139168	0.0571831		-1.17788	0.139168	0.0387648	down4h
60626	0.00973537	4.84234	0.959753		-2.14091	4.84234	1.81085e-07	down4h
60684	-0.0398613	3.86705	0.880099		-1.38075	3.86705	0.000273596	down4h
60686	-0.0702075	2.50014	0.800563		-1.24289	2.50014	0.0016818	down4h
613	0.059969	4.7315	0.785481		-1.48518	4.7315	2.75098e-05	down4h
6239	0.359289	4.89546	0.298633		-1.98907	4.89546	9.76195e-05	down4h
6257	0.00267945	5.61245	0.988587		-1.32566	5.61245	1.21478e-05	down4h
6272	0.048149	5.49303	0.816029		-1.10498	5.49303	0.000175529	down4h
6276	-0.408184	-1.88878	0.601954		-5.66757	-1.88878	0.0183878	down4h
6301	-0.202101	4.31391	0.349641		-1.10158	4.31391	0.000268181	down4h
6311	0.0794153	3.97641	0.761434		-1.49701	3.97641	0.000119942	down4h
6314	0.32299	6.92522	0.29895		-2.38021	6.92522	6.16013e-06	down4h
6327	-0.906306	-2.32394	0.380898		-5.19726	-2.32394	0.042029	down4h
6337	-0.192153	0.493973	0.552099		-2.3134	0.493973	0.000502273	down4h
63894	0.158958	3.14087	0.449829		-1.22377	3.14087	0.000127578	down4h
63897	0.269971	0.681972	0.524574		-1.72858	0.681972	0.00542368	down4h
63908	-0.258006	1.79441	0.277132		-1.37841	1.79441	0.00030307	down4h
63914	0.386717	0.400684	0.24285		-1.66683	0.400684	0.000929289	down4h
63929	-0.348143	1.58346	0.167586		-1.2549	1.58346	0.0009092	down4h
63931	-0.0296731	0.227742	0.920872		-1.53706	0.227742	0.0019396	down4h
63939	-0.217349	4.29528	0.323424		-4.70792	4.29528	2.01792e-09	down4h
63943	-0.120689	1.24119	0.745885		-1.44632	1.24119	0.0106616	down4h
6397	-0.0154518	11.123	0.918047		-1.05497	11.123	1.10245e-05	down4h
6399	0.0724691	2.56391	0.768665		-1.53947	2.56391	6.86027e-05	down4h
6403	0.212777	1.40328	0.473464		-3.4503	1.40328	7.61315e-06	down4h
6404	-0.131455	9.55191	0.452678		-3.91061	9.55191	7.22559e-11	down4h
64062	0.0837175	3.79546	0.800287		-1.44578	3.79546	0.00123541	down4h
64101	0.017124	6.78757	0.924863		-2.73929	6.78757	5.21175e-09	down4h
64110	-0.5029	0.181028	0.187219		-1.21332	0.181028	0.0306745	down4h
64112	-0.347566	3.46588	0.0912114		-1.50941	3.46588	1.56199e-05	down4h
64121	-0.150054	4.14148	0.493582		-1.97	4.14148	1.31077e-06	down4h
64132	-0.202484	1.34736	0.515768		-2.79012	1.34736	2.66906e-05	down4h
64145	0.168979	4.249	0.447345		-1.13258	4.249	0.000322412	down4h
64147	0.127299	0.439196	0.639081		-2.91864	0.439196	5.07956e-05	down4h
64167	0.101241	2.94779	0.651481		-1.85517	2.94779	4.51508e-06	down4h
64170	-0.224281	1.43852	0.403432		-1.6079	1.43852	0.000372562	down4h
64174	-0.106495	7.73374	0.628458		-1.84559	7.73374	2.19786e-06	down4h
64175	0.42297	1.65603	0.0725637		-1.26646	1.65603	0.000590395	down4h
64180	0.0424419	3.92781	0.854476		-1.86013	3.92781	6.24768e-06	down4h
64207	-0.0750223	6.90427	0.745422		-2.71834	6.90427	8.4851e-08	down4h
64210	0.0500102	2.63296	0.80736		-1.18844	2.63296	0.000264675	down4h
64236	0.0239179	6.5125	0.909904		-1.36027	6.5125	3.04732e-05	down4h
642373	0.141662	3.42368	0.604931		-1.36499	3.42368	0.00110849	down4h
642397	-0.365243	0.82855	0.298348		-1.1475	0.82855	0.00959889	down4h
642517	0.28869	2.15992	0.387741		-1.85224	2.15992	0.000333372	down4h
642819	-0.193311	2.4161	0.382839		-1.15354	2.4161	0.00190581	down4h
64282	-0.239863	3.34237	0.22875		-2.30757	3.34237	1.81255e-07	down4h
643072	-0.243303	4.97725	0.283188		-1.2747	4.97725	9.15215e-05	down4h
643155	-0.488854	0.586179	0.12091		-1.55592	0.586179	0.000974651	down4h
643180	-0.386303	1.47461	0.140843		-1.63629	1.47461	9.93555e-05	down4h
64324	0.233724	6.79397	0.45053		-2.93708	6.79397	9.48758e-07	down4h
643253	0.287749	0.39007	0.494474		-1.77287	0.39007	0.00321076	down4h
643406	-0.123144	-0.374175	0.810238		-1.13079	-0.374175	0.0446528	down4h
64342	-0.0875056	4.64469	0.641727		-2.18091	4.64469	1.02852e-07	down4h
643641	0.284315	3.12603	0.286726		-1.82783	3.12603	4.18133e-05	down4h
643699	0.0804416	0.557415	0.841137		-1.73303	0.557415	0.00929268	down4h
643853	0.196772	3.70289	0.514919		-2.84286	3.70289	2.4153e-06	down4h
64386	0.0552078	10.5901	0.709312		-1.44362	10.5901	3.73082e-07	down4h
64393	-0.176977	2.65716	0.391358		-1.21019	2.65716	0.000205867	down4h
64395	0.0437557	4.39591	0.892225		-1.52613	4.39591	0.000593306	down4h
64397	0.148568	8.09764	0.578485		-1.54312	8.09764	7.86346e-05	down4h
64400	-0.0853032	3.91536	0.667341		-3.63828	3.91536	5.49077e-09	down4h
644019	-0.158608	4.05653	0.438876		-1.73856	4.05653	4.12156e-06	down4h
64407	-0.0491735	6.60791	0.780537		-2.07475	6.60791	6.41693e-08	down4h
644096	-0.324914	0.983034	0.225862		-2.11806	0.983034	3.21855e-05	down4h
64412	-0.243395	2.98932	0.272106		-1.5898	2.98932	6.1821e-05	down4h
64421	-0.225848	3.31949	0.300902		-1.55863	3.31949	1.60265e-05	down4h
644634	-0.103672	0.0188052	0.786811		-1.35069	0.0188052	0.0159752	down4h
644961	0.485344	1.09472	0.21075		-2.76204	1.09472	0.000219855	down4h
645158	-0.206917	0.220035	0.558095		-3.44175	0.220035	0.000517145	down4h
645191	-0.423833	1.64726	0.090556		-4.831	1.64726	1.29482e-07	down4h
645455	0.186458	1.52127	0.558655		-2.97982	1.52127	1.47899e-05	down4h
645460	-0.0535672	3.75001	0.781615		-2.38927	3.75001	7.46211e-08	down4h
645513	0.0383564	2.69885	0.891416		-1.43417	2.69885	0.00149929	down4h
645700	-0.716077	-1.51739	0.332442		-6.03287	-1.51739	0.0146694	down4h
6458	0.642646	1.2002	0.0394772		-4.14392	1.2002	7.1279e-07	down4h
64581	-0.0534409	9.51622	0.725125		-1.62101	9.51622	1.47926e-07	down4h
645811	0.178854	-0.60698	0.700209		-1.97721	-0.60698	0.00748038	down4h
6459	-0.959014	-1.77964	0.304703		-2.88005	-1.77964	0.0485473	down4h
64599	0.202984	6.42514	0.323234		-1.19495	6.42514	6.22699e-05	down4h
646074	0.224222	-1.50644	0.730883		-2.88294	-1.50644	0.0264252	down4h
646214	-0.405297	0.679699	0.301199		-1.08854	0.679699	0.0369363	down4h
646396	-0.491469	-1.4704	0.468679		-6.38073	-1.4704	0.00468218	down4h
646450	-0.306771	0.00785279	0.351337		-1.28187	0.00785279	0.00646614	down4h
64682	-0.155943	3.76276	0.552056		-1.31475	3.76276	0.000404939	down4h
646982	1.17837	-1.93624	0.192357		-5.6747	-1.93624	0.0254742	down4h
64708	-0.351427	1.82516	0.121811		-1.14758	1.82516	0.000556946	down4h
64718	0.0871237	5.88387	0.643946		-1.55567	5.88387	2.5757e-06	down4h
647310	0.137237	-1.28067	0.83242		-3.20758	-1.28067	0.0183009	down4h
64756	-0.180036	1.26965	0.434735		-1.12974	1.26965	0.00211644	down4h
64757	0.036498	5.03837	0.848765		-1.86798	5.03837	6.52647e-07	down4h
64763	0.138881	3.19103	0.536442		-1.43441	3.19103	5.68242e-05	down4h
64764	0.152889	3.21162	0.504504		-2.20798	3.21162	1.29679e-06	down4h
64766	0.00988829	2.67575	0.972279		-1.23801	2.67575	0.00171422	down4h
64783	0.160977	3.43993	0.600824		-2.50363	3.43993	1.62127e-05	down4h
64793	-0.0105144	0.361124	0.980753		-1.51684	0.361124	0.0174599	down4h
64795	0.0444412	6.95251	0.805661		-2.13377	6.95251	6.10572e-08	down4h
647979	-0.145925	6.30233	0.523603		-1.75507	6.30233	5.68328e-06	down4h
64802	-0.017006	3.04861	0.932846		-2.20455	3.04861	3.69811e-07	down4h
64843	-0.22808	3.15234	0.336969		-3.02727	3.15234	1.39416e-07	down4h
64852	-0.265013	1.02779	0.297793		-1.06351	1.02779	0.00497804	down4h
64853	-0.240778	2.64619	0.251586		-1.20649	2.64619	0.000129843	down4h
64858	-0.362491	-0.106449	0.371189		-1.21184	-0.106449	0.0293028	down4h
64863	-0.00768302	2.62734	0.97587		-2.10913	2.62734	1.13652e-05	down4h
64866	0.241331	-0.509616	0.575874		-3.41768	-0.509616	0.00538212	down4h
648987	-0.63177	0.169759	0.148081		-2.81976	0.169759	0.000634368	down4h
64926	0.0988571	5.5141	0.590356		-1.0041	5.5141	0.000121491	down4h
65018	-0.110746	6.78834	0.557877		-1.69063	6.78834	1.04478e-06	down4h
6502	0.0996033	0.752678	0.764123		-4.08474	0.752678	1.63318e-05	down4h
65080	-0.216327	3.88499	0.272308		-1.30101	3.88499	2.46895e-05	down4h
65082	0.110705	3.18562	0.585291		-1.27305	3.18562	6.74792e-05	down4h
65123	0.136917	5.91952	0.565581		-1.2515	5.91952	0.000189873	down4h
6515	0.0261626	9.27397	0.865605		-1.25055	9.27397	2.76635e-06	down4h
652276	0.178416	1.0972	0.492555		-1.45778	1.0972	0.000938727	down4h
65243	0.625238	0.170882	0.15005		-1.62928	0.170882	0.0117533	down4h
65258	-0.117361	7.35426	0.490236		-2.07827	7.35426	3.68375e-08	down4h
653075	-0.100898	0.239063	0.821318		-1.70201	0.239063	0.024797	down4h
653188	-0.237696	-0.0053862	0.563368		-1.72368	-0.0053862	0.0138048	down4h
653238	-0.221592	4.36978	0.260203		-3.27964	4.36978	2.99573e-09	down4h
653268	0.074246	5.23972	0.69406		-2.17616	5.23972	9.6898e-08	down4h
653501	0.196824	0.232662	0.615623		-5.20582	0.232662	0.0436353	down4h
653739	0.11531	-1.25295	0.875516		-2.08555	-1.25295	0.0469684	down4h
654346	1.1569	-1.12266	0.0614245		-2.28795	-1.12266	0.030626	down4h
654434	-0.139218	2.54887	0.549609		-2.54015	2.54887	1.20178e-06	down4h
6560	0.423166	4.14344	0.107479		-1.3586	4.14344	0.00017065	down4h
6573	0.0670077	7.26953	0.691238		-1.26461	7.26953	6.02701e-06	down4h
6583	-0.0112175	5.69229	0.951549		-1.03618	5.69229	0.000112375	down4h
6584	-0.491753	-0.334249	0.217416		-1.3607	-0.334249	0.0131331	down4h
6595	0.125841	6.02397	0.575385		-2.19469	6.02397	5.59282e-07	down4h
65981	-0.0840649	1.93976	0.714233		-1.38947	1.93976	0.000349139	down4h
65988	-0.324064	0.935394	0.214996		-1.28549	0.935394	0.00216722	down4h
65993	-0.296738	1.78638	0.210979		-2.44036	1.78638	1.79341e-06	down4h
65999	-0.172394	2.30698	0.435381		-1.34705	2.30698	0.000157552	down4h
660	-0.0432303	3.04366	0.835951		-2.08528	3.04366	3.01325e-06	down4h
66002	0.549362	1.95132	0.0845721		-1.47524	1.95132	0.00155552	down4h
6601	0.213513	5.64026	0.259969		-1.30348	5.64026	1.2938e-05	down4h
6605	-0.160051	3.548	0.409853		-1.0125	3.548	0.000258576	down4h
6618	-0.667274	0.420719	0.0471246		-1.20644	0.420719	0.0124709	down4h
6621	0.158517	3.03568	0.489502		-2.26881	3.03568	1.6756e-06	down4h
6642	0.0532018	5.962	0.770917		-1.08249	5.962	6.2716e-05	down4h
[truncated: 3,458 more rows]
